1  
2  
3  
4  
5  
6  
7  
8  
9  
10  
11  
12  
13  
14  
15  
16  
17  
18  
19  
20  
21  
22  
23  
24

**Molecular Systems Predict Equilibrium Distributions of Phenotype Diversity  
Available for Selection**

Miguel A. Valderrama-Gómez<sup>1</sup> and Michael A. Savageau<sup>1,2,\*</sup>

<sup>1</sup>Department of Microbiology & Molecular Genetics, and <sup>2</sup>Department of Biomedical Engineering, University of California, Davis, One Shields Avenue, Davis, CA 95616 USA

\*Correspondence to: 228 Briggs, Davis, California 95616, 1-530-220-3198 (Phone),  
masavageau@ucdavis.edu

Keywords: biochemical systems theory / system design space / phenotype-centric modeling / theoretical population genetics / Fisher's Geometric Model / evolutionary dynamics / circadian clock circuitry

25  
26  
27  
28  
29  
30  
31  
32  
33  
34  
35  
36  
37  
38  
39  
40  
41  
42  
43  
44  
45  
46  
47  
48  
49

**Abstract**

Two long standing challenges in theoretical population genetics and evolution are predicting the distribution of phenotype diversity generated by mutation and available for selection and determining the interaction of mutation, selection, and drift to characterize evolutionary equilibria and dynamics. More fundamental for enabling such predictions is the current inability to causally link population genetic parameters, selection and mutation, to the underlying molecular parameters, kinetic and thermodynamic. Such predictions would also have implications for understanding cryptic genetic variation and the role of phenotypic robustness.

Here we provide a new theoretical framework for addressing these challenges. It is built on Systems Design Space methods that relate system phenotypes to genetically-determined parameters and environmentally-determined variables. These methods, based on the foundation of biochemical kinetics and the deconstruction of complex systems into rigorously defined biochemical phenotypes, provide several innovations that automate (1) enumeration of the phenotypic repertoire without knowledge of kinetic parameter values, (2) representation of phenotypic regions and their relationships in a System Design Space, and (3) prediction of values for kinetic parameters, concentrations, fluxes and global tolerances for each phenotype.

We now show that these methods also automate prediction of phenotype-specific mutation rate constants and equilibrium distributions of phenotype diversity in populations undergoing steady-state exponential growth. We introduce this theoretical framework in the context of a case study involving a small molecular system, a primordial circadian clock, compare and contrast this framework with other approaches in theoretical population genetics, and discuss experimental challenges for testing predictions.

50 INTRODUCTION

51

52 The concept of evolution is easily stated and understood: Mutation generates diversity of phenotypes and  
53 selection favors those with the greatest heritable fitness. However, there are many complex and inter-  
54 related issues that must be addressed to achieve a deeper understanding. Two prominent examples that  
55 continue to be fundamental challenges are (1) determining the *distribution of phenotype diversity*, which  
56 offers opportunities for innovation (Charlesworth, 1996; Bataillon & Bailey, 2014) and (2) determining the  
57 interaction of *mutation, selection, drift and population structure* to determine equilibria and the dynamics  
58 of evolution (Gillespie, 2004; Orr, 2005; Wakeley, 2005).

59 While the distribution in the numbers and types of changes in DNA can be determined because of  
60 advances in genome sequencing technology (Metzker, 2010), determining the distribution of the resulting  
61 phenotypes and their fitness characteristics (determinants of total fitness) in natural populations is difficult  
62 in the extreme (Charlesworth, 1996). The true number of phenotypes and fitness characteristics in the  
63 population is typically unknown and any observed distribution of total fitness (e.g., growth rate of bacteria)  
64 is skewed by what can be observed in the field or measured or generated experimentally in the laboratory  
65 (Gallet et al., 2012; Robert et al., 2018; Bondel et al., 2019; Lebeuf-Taylor, et al., 2019). With large data  
66 sets, correlations can be established between genome changes and fitness changes in a given environment.  
67 However, at a fundamental level there are many fitness components based on function that remain to be  
68 identified and characterized and many unsolved mappings that prevent a predictive, causal linking of  
69 mutations in DNA, properties of molecular components, integrated system function, phenotypic repertoire,  
70 and fitness. In short, there is little relevant theory for guidance.

71 There is a rich field of theoretical population genetics developed over more than a century that  
72 addresses the interaction of *mutation, selection, drift and population structure* (Gillespie, 2004; Orr, 2005;  
73 Wakeley, 2005). However, aside from the simpler cases of one-to-one mapping between gene and  
74 phenotypic function, an appropriate theoretical framework is lacking to pose and answer questions for the  
75 more complex cases that involve mappings between many genes and many functional contributions to  
76 phenotypes.

77 In reviewing the genetic theory of adaptation, Orr (2005) examined “the reasons a mature  
78 [mathematical] theory has been slow to develop and the prospects and problems facing current theory” and  
79 concluded that although recent models “seem to successfully explain certain qualitative patterns [...] future  
80 work must determine whether present theory can explain the genetic data quantitatively”. Experimental  
81 evolution studies have shown that mutations in a single gene affecting a specific enzyme can lead to a  
82 marked change in organismal fitness (Barrick & Lenski, 2013; Gresham & Jong, 2015). Although the

83 results might be explained qualitatively, without an adequate systems theory these explanations cannot  
84 provide a rigorous, quantitative, causal understanding of the complex underlying events.

85 Can knowledge of molecular systems tell us anything about the distribution of mutant phenotypes  
86 and their evolution? A large part of the problem in relating molecular mechanisms to phenotype  
87 distributions and evolution is the inability to relate the genotype and environment to the phenotype exhibited  
88 by a biological system, which is one of the ‘Grand Challenges’ in biology (Brenner, 2000). The causal  
89 linking of genotype to phenotype involves at least three essential mappings: First is the mapping from the  
90 *digital values* of the genome sequence to the *analogue values* of the kinetic parameters that characterize the  
91 underlying molecular processes. Second is the mapping from the *kinetic parameters* of the individual  
92 component processes to the quantitative *biochemical phenotypes* of the integrated cellular system. Third is  
93 the mapping from the *biochemical (endo-) phenotypes* to the *organismal (exo-) phenotypes*, including  
94 observables such as growth rate, taxis, adhesion, etc. The first of these mappings deals with protein  
95 structure function relationships, which relate DNA sequence to properties of the encoded protein. Recent  
96 success in solving the protein folding problem (Callaway, 2020) bodes well for the eventual ability to  
97 predict kinetic parameters. The second mapping is the focus of Biochemical Systems Theory (Savageau,  
98 1971; 2009; Voit, 2000; 2013), which in the past decade has provided a novel system deconstruction that  
99 maps genetically-determined parameters and environmentally-determined variables to biochemical  
100 phenotypes. The result is a highly structured partitioning of parameter space that is defined as the *System*  
101 *Design Space* (Savageau et al., 2009). A Design Space Toolbox (DST3) is available with numerous tools  
102 that automate the analysis (Valderrama-Gómez et al., 2020). The third of these mappings is perhaps the  
103 most difficult, in any but the simplest cases of one-gene one-protein one-phenotype, due to the large number  
104 of genes and phenotypes with many-to-many interactions that currently can only be characterized by large  
105 data sets and statistical correlations (McCarthy et al., 2008; Greenbury et al., 2016).

106 If we could enumerate the full repertoire of phenotypic functions that could be exhibited by a given  
107 biological system and know the ranking of phenotype frequencies in the population undergoing mutational  
108 exchange, we would have a deep understanding of the functional basis for phenotypic diversity and  
109 plasticity available for selection to act upon. Here we address these issues in five parts.

110 First, we introduce a small molecular system, a primordial precursor to a circadian clock, as an aid  
111 to understanding this novel approach. We have specifically selected a hypothesis-motivated example with  
112 unknown parameter values for this purpose because any real system will initially have many unknowns and  
113 involve the formulation of, and discrimination among, many hypotheses that require experimental testing.  
114 Our approach has advantages to offer specifically at this stage of an investigation (Lomnitz & Savageau,  
115 2016a). Second, we utilize System Design Space concepts (**Supplemental Information, Section S1**) to  
116 extend and apply the phenotype-centric strategy to predict phenotype-specific mutation rate constants. This

117 involves formulating phenotype-specific mutation rates based on transition probabilities between  
118 biochemical phenotypes. These rate constants are then used to formulate population dynamic equations for  
119 predicting equilibrium distributions of phenotype diversity under non-selecting and selecting conditions.  
120 Third, results for the population genetic model are presented. Fourth, specific predictions are discussed in  
121 the light of experimental challenges for their testing. Fifth, in the discussion, we briefly compare and  
122 contrast the theoretical framework provided by the System Design Space approach with that provided by  
123 other approaches.

124

## 125 PUTATIVE PRIMORDIAL CIRCADIAN CLOCK

126

127 The molecular system, treated as a case study here, is related to the positive-negative feedback module  
128 found at the core of nearly all circadian clocks (Bell-Pedersen et al., 2005; Hardin, 2011; Cohen & Golden,  
129 2015; Nohales & Kay, 2016; Papazyan et al., 2016; Creux & Harmer, 2020) and several synthetic oscillator  
130 designs (Atkinson et al., 2003; Stricker et al., 2008; Tigges et al., 2009; Lomnitz & Savageau, 2014). In  
131 the transcription-translation oscillators, this module consists of a positive transcription factor that activates  
132 its own synthesis as well as synthesis of a negative transcription factor, which in turn represses synthesis  
133 of the positive transcription factor. The originally identified module in *Drosophila* is elaborated upon in  
134 animals (Preitner et al., 2002) and plants (Creux & Harmer, 2020) with numerous variations on the theme,  
135 including diverse input stimuli that modulate expression of one or both factors (Balsalobre, et al. 2000;  
136 O'Neill & Reddy, 2012) and rich output interactions with nearly all cellular functions (Creux & Harmer,  
137 2020).

138 In the cyanobacterial clock, the transcription-translation mechanism is a minor player whereas a  
139 posttranslational oscillator mechanism with different positive and negative interactions plays the dominant  
140 role (Cohen & Golden, 2015). When growing exponentially in a normal diurnal light cycle, phenotypes  
141 without the oscillatory characteristic are at a selective disadvantage when compared to the wild type  
142 (oscillatory phenotype); however, they exhibit no measurable disadvantage when grown under the non-  
143 selecting condition (constant light), as determined by growth competition between mutants and wild type  
144 in an otherwise isogenic background (Ouyang et al., 1998). Under these conditions, biochemical  
145 phenotypes map closely to organismal phenotypes, which is the assumption typically made in studying the  
146 evolution of specific molecular systems in bacteria (Brajesh, et al., 2019).

147 Roenneberg & Merrow (2002) and many others have speculated that the robust limit cycle or  
148 sustained oscillation exhibited by circadian clocks in modern organisms is unlikely to have arisen full  
149 blown. We propose that some of the coordinating functions could have been provided by a simpler core  
150 module having a damped oscillation with a frequency that resonates to and becomes synchronized with the

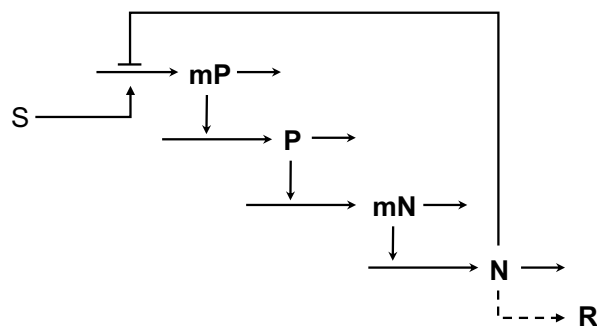

151

152 **Figure 1. Common genetic module for the putative precursor of the modern core mechanism of**  
153 **nearly all circadian clocks.** Positive (P) and negative (N) transcription factor proteins and the  
154 corresponding mRNAs (mP and mN). Environmental input stimulus (S) and biochemical output response  
155 (R) are suggestive only, other targets and coordinating signals could be considered. See also **Supplemental**  
156 **Information, Section S2.**

157

158 diurnal cycle. Indeed, such damped oscillations have been experimentally observed in strains of  
159 cyanobacteria: namely, clock mutants of *Synechococcus* (Ouyang et al., 1998; Kawamoto et al., 2020) and  
160 marine *Prochlorococcus marinus* (Holtzendorff et al., 2008).

161 For our purposes here, we shall consider the primordial mechanisms to involve only the negative  
162 feedback loop at the core of modern transcription-translation mechanisms, as shown schematically in  
163 **Figure 1.** The equations used to represent this putative primordial clock (**Supplemental Information,**  
164 **Section S2**) are based on the foundation of fundamental biochemical kinetics. These models have broad  
165 general applicability, as the vast majority of biochemical models are of this type (Chelliah et al., 2013).  
166 These equations, recast as an equivalent GMA-system of equations (**Supplemental Information, Section**  
167 **S3**), can be expressed as a set of differential-algebraic equations in the syntax of the Design Space Toolbox  
168 (Lomnitz & Savageau, 2016b).

169 For the illustrative purposes of this case study, we make three simplifying assumptions. (1) The  
170 precursor is likely to involve a minimal number of processes and a minimal degree of cooperativity in the  
171 interactions. The two-transcription factor model involves at least four processes and two cooperative DNA  
172 interactions. For it to generate a damped oscillatory response, the system must be near the threshold of  
173 instability, which requires a value of loop cooperativity [ $(n*p)$  in the **Eqn. (S1)** to **Eqn. (S4)**] equal to 4 for  
174 a system with four temporally dominant stages (Savageau, 1975; Thron, 1991). We let the cooperativity  
175 parameters  $n=p=2$ . Kawamoto et al. (2020) considered a simpler three-stage model for *Synechococcus*; but  
176 it requires a much higher degree of cooperativity,  $n > 8$  as shown in Savageau (1975). (2) To provide the  
177 most challenging shape for testing different methods of volume calculation, we select values for the two  
178 parameters (capacity for regulation for the two transcripts) with the potential to break the symmetry such  
179 that a skewed volume is generated for the phenotype with an oscillatory characteristic (**Supplemental**

**Table 1. Phenotypic repertoire for the model in Figure 1.**

| Phenotype Number | Phenotype Signature | Eigenvalues with Positive real part | Complex Conjugate Eigenvalues |
|------------------|---------------------|-------------------------------------|-------------------------------|
| 1                | 11 11 11 11 11 11   | 0                                   | -                             |
| 3                | 11 11 11 11 21 11   | 0                                   | -                             |
| 5                | 11 11 21 11 11 11   | 0                                   | -                             |
| 6                | 11 11 21 11 11 21   | 0                                   | -                             |
| 7                | 11 11 21 11 21 11   | 0                                   | +                             |
| 8                | 11 11 21 11 21 21   | 0                                   | -                             |
| 11               | 21 11 11 11 21 11   | 0                                   | -                             |
| 15               | 21 11 21 11 21 11   | 0                                   | -                             |
| 16               | 21 11 21 11 21 21   | 0                                   | -                             |

180 Results determined using only Eqns. (S5 to S12).

181 **Information, Section S4, Figure S1).** (3) To aid visualization of the results we focus on a two-dimensional  
182 slice through the System Design Space with the two binding constants displayed on the vertical and  
183 horizontal axes, which is representative of the invariant for this system design space (**Supplemental**  
184 **Information, Section S5, Figure S2).**

185 The Design Space Toolbox 3 (DST3, Valderrama-Gómez et al., 2020) can be used to enumerate  
186 the repertoire of phenotypes without assuming values for any of the model's kinetic parameters, and the  
187 results demonstrate a maximum of nine possible phenotypes. The listing of the phenotypes, along with the  
188 properties of their eigenvalues when  $n=p=2$ , is shown in **Table 1**. Each sequential pair of integers in the  
189 phenotype signature identifies the specific positive and negative terms in the corresponding GMA equation  
190 that are instrumental in defining the phenotype. A comparison of the phenotype signatures with the GMA  
191 equations in **Supplemental Information, Section S3**, identifies the specific S-system equation for each  
192 phenotype. All phenotypes are stable with no complex conjugate eigenvalues, except for phenotype #7;  
193 thus, only phenotype #7 has the potential to initiate damped oscillatory behavior.

194 It should be emphasized that the enumeration of the full repertoire by DST3 is accomplished  
195 *without having to specify values for any of the thermodynamic and kinetic parameters*. By specifying the  
196 stoichiometry for binding repressor and activator as  $n=2$  and  $p=2$ , DST3 automatically predicts scaled  
197 values (**Table 2, Legend**) of all 12 thermodynamic and kinetic parameter values of the system, identifies  
198 the region in design space for the realization of phenotype #7, the phenotype of interest here, as well as the  
199 steady-state values of the four dynamic variables. By choosing the simplest scaling, generating a skewed  
200 volume for phenotype #7, and shifting the entire Design Space to center the visualization on phenotype #7  
201 (**Supplemental Information, Section S5, Figure S2**), we predict values for the 12 parameters and the  
202 steady-state values for the four dynamic variables as shown in **Table 2**.

203

204 **Table 2. Scaled values for the parameters and steady state concentrations automatically determined**  
205 **and fixed for phenotype 7 (11 11 21 11 21 11).** The behavior of the model is determined by these scaled  
206 parameter values. If necessary, twelve experimental measurements (e.g., maximum expression, minimum  
207 expression and lifetime of each mRNA and protein) are sufficient to determine the actual parameter values.  
208 However, as can be seen in the **Eqn. (1)**, our methods involve differences in log space so the scale factors  
209 cancel out and thus there is no effect on the qualitative or quantitative results. Predicted normalized steady-  
210 state values:  $mP = 100.0$ ;  $P = 1.0$ ;  $mN = 3.16$ ;  $N = 3.16$ .  
211

| Parameters    | Value |
|---------------|-------|
| <b>KN</b>     | 0.316 |
| <b>KP</b>     | 1.78  |
| <b>amNmax</b> | 10.0  |
| <b>amNmin</b> | 1.00  |
| <b>amPmax</b> | 10000 |
| <b>amPmin</b> | 1.00  |
| <b>aN</b>     | 1.00  |
| <b>aP</b>     | 0.01  |
| <b>bmN</b>    | 1.00  |
| <b>bmP</b>    | 1.00  |
| <b>bN</b>     | 1.00  |
| <b>bP</b>     | 1.00  |

212  
213 Although we could examine variations in all 12 parameters, we choose to fix the predicted values  
214 for all parameters except for the two equilibrium dissociation constants  $K_P$  and  $K_N$ , which will be allowed  
215 to vary because of mutation. This simplification reduces the dimensions of the Design Space for ease in  
216 visualizing the results while providing an accurate representation of the underlying Design Space invariant.  
217 The size of the regions in Design Space occupied by each of the phenotypes (**Figure 2A**) then can be  
218 determined by a vertex enumeration method (Avis 2000, Barber et al. 1996). These methods work well for  
219 small systems and other methods are available for large systems (**Supplemental Information, Section S6,**  
220 **Figure S3**).

221 We are fully aware that this simplified example used to introduce our theoretical framework does  
222 not illustrate its full potential. There is a growing number of molecular systems for which there is  
223 information sufficient to specify their architecture. By model architecture we mean molecules, interactions  
224 among them, and the signs of the interactions. Surprisingly, much of what can be learned about the system  
225 depends largely on its architecture. It suggests mechanistic hypotheses without having to know details of  
226 the many kinetic and thermodynamic parameters. As noted in the **INTRODUCTION**, this is all that is  
227 needed to formulate testable hypotheses amenable to analysis in the System Design Space framework. One  
228 the other hand, we are also fully aware that this simplified example does not address numerous realistic and  
229 important questions in the large field of theoretical population genetics. These issues must be the subject of  
230 future work.



231 NEW APPROACHES: DERIVATION OF PHENOTYPE-SPECIFIC MUTATION RATE CONSTANTS  
232 AND POPULATION DYNAMIC EQUATIONS

233  
234 The System Design Space approach enables a novel ‘phenotype-centric’ modeling strategy that is radically  
235 different from the conventional ‘simulation-centric’ approach (Valderrama-Gómez et al., 2018). A  
236 summary of System Design Space concepts is provided (**Supplemental Information, Section S1**) to  
237 facilitate understanding of the phenotype-centric strategy used to predict phenotype-specific mutation rate  
238 constants.

239 The mechanistic framework we are proposing requires new concepts and methods; the reader is  
240 directed to **Supplemental Information** where these are fully developed. Here we simply summarize the  
241 four factors in System Design Space contributing to the probability of transition between phenotypes by  
242 mutational change in the mechanistic parameters: (1) mutated parameters change value along ‘tracks’  
243 orthogonal to non-mutated parameters, (2) ‘volume’ of the phenotype resulting from mutation, (3) ‘size  
244 scale’ of parameter changes between original (donor) and resultant (recipient) phenotypes, and (4)  
245 ‘directional bias’ of parameter changes that are more probable in one direction vs. the alternative. These  
246 four factors are elaborated on in the following sections and it will be most helpful to visualize these factors  
247 in terms of the geometry of System Design Space that is determined by the architecture of the underlying  
248 molecular system (**Supplemental Information, Section S7**).

249  
250 *Mutated vs. Orthogonal Parameters*

251  
252 We consider only mutational events that influence a single parameter. Thus, we need only consider a single  
253 ‘track’ for the mutated parameter between values of orthogonal parameters. Such mutations can influence  
254 multiple systemic functions indirectly, which is pleiotropy at the phenotype level. The tracks are rigorously  
255 defined by the vertices of the phenotype polytopes and, in some cases, polytopes are split into more than  
256 one track (**Figure S4D**). The single parameter restriction can be relaxed to consider mutations that  
257 influence multiple parameters of a single component, which might be considered pleiotropy at the single  
258 molecule level (e.g., the degradation rate constant of a transcription factor and its DNA binding constant).  
259 The single parameter restriction can also be relaxed to consider simultaneously multiple mutants (e.g., rare  
260 double mutant events). However, to make causal predictions upon removal of the single parameter  
261 restriction will require formulation of testable mechanistic hypotheses (Lomnitz & Savageau, 2016a).

262  
263  
264

265 ***Phenotype Volume***

266  
267 Because the volume of a phenotype becomes infinite when the phenotype is independent of some parameter  
268 in the model, we bound the universe of values for all parameters by a hyper-cube in log space that is  $\Pi$ -  
269 orders of magnitude on edge. The value of  $\Pi$  should be large enough to include all phenotypes in the  
270 System Design Space but not so large as to exceed physically realistic parameter values; this will exclude  
271 phenotypes that can only be realized with unrealistic parameter values. We have set  $\Pi = 6$ , which seems  
272 large enough to cover all values that can be distinguished experimentally, which is typically about 3-orders  
273 of magnitude. For example, the repressor for the lactose operon of *Escherichia coli* binds tightly to specific  
274 recognition sites in the DNA with an occupancy of nearly 100%, but reduction of its equilibrium  
275 dissociation constant by three orders of magnitude reduces the occupancy to nearly 0% (Lewin, 2008).  
276 Moreover, it is very unlikely that parameter values ever go to zero because there are typically promiscuous  
277 proteins capable of performing the same function with at least some minimal activity (Khersonsky &  
278 Tawfin, 2010; Rueda et al., 2019). In any case, we have obtained similar results with  $\Pi = 8$ , and DST3  
279 allows users to select a custom value for  $\Pi$ .

280         Given a particular set of parameter values characterizing the donor phenotype in volume  $V_i$ , one of  
281 the four contributions to the probability of mutating to any other set of parameter values in the volume of  
282 the recipient phenotype  $V_j$ , along a given mutant parameter track, is given by the ratio of the recipient  
283 volume to the total volume along the entire track. Thus, this contribution to the probability of mutating  
284 from a phenotype with a small track volume to one with a large track volume is greater than in the opposite  
285 direction.

286

287 ***Size Scale***

288

289 Large scale mutations are rare; small scale mutations are frequent in well adapted systems (Bataillon &  
290 Bailey, 2014; Tataru et al., 2017; Bondel et al., 2019; Templeton, 2021). This size-scale effect depends on  
291 the distance,  $s$ , between the operating point (a parameter set) of the donor phenotype and that of the recipient  
292 phenotype. By sampling each donor and recipient combination along the line representing the change in  
293 the mutated mechanistic parameter, the probability of each mutation can be calculated based on the track  
294 volume of the recipient phenotype and distribution of size-scale effects for the mutations. Although the  
295 actual distributions for size-scale effect are unknown, we assume that the probability of parameter change  
296 by mutation decreases exponentially with a size scale  $\lambda$ , i.e.  $\sim \exp(-s/\lambda)$ . This will be made more concrete  
297 in **RESULTS (first subsection)**.

298 The size-scale effect of mutations can be calculated as an average distance over all combinations  
299 of donor and recipient parameter values within a track, which is computationally demanding, or by  
300 considering the distance between ‘phenotype centroids’ (red dots in **Figure S4B,C,D**), analogous to the  
301 ‘centers of mass’ in mechanics. The results are the same for both methods (**Supplemental Information,**  
302 **Section S8, Figure S5**) and, since it is computationally more efficient, we use the centroid method.

303

### 304 ***Directional Bias***

305

306 The probability of mutation can be further refined by consideration of “directional bias”. The probability  
307 is larger when a parameter change is in the direction of increasing entropy; it is smaller when the change is  
308 in the direction of decreasing entropy. Although the actual differences in value are currently unknown, we  
309 account for these directional biases by assigning a multiplicative weighting factor  $\delta$  that increases the  
310 effective size scale  $\lambda$  when a parameter change is in the direction of increasing entropy and decreases it  
311 when the parameter change is in the direction decreasing entropy (**Supplemental Information, Section**  
312 **S9, Table S1**).

313

### 314 ***Mutation Rates***

315

316 *Phenotype-specific mutation rate constants* are determined in three steps. First, for each donor  $i$  and  
317 recipient  $j$  phenotype, the mechanistic parameter contribution to the mutation,  $K_{ij}$ , is determined with an  
318 exponential distribution (**Table S1**) involving size scale  $\lambda$ , directional bias  $\delta$ , and the magnitude of  
319 parameter difference  $s$ , between phenotype centroids  $C_i$ , i.e.,

$$320 \quad K_{ij} \sim \exp(-|\log C_i - \log C_j| / \lambda \delta) \quad \text{or} \quad K_{ij} \sim \exp(-|\log C_i - \log C_j| \delta / \lambda) \quad (1)$$

321 depending on whether the directional bias of the mutation is toward increased entropy ( $1/\delta$ ) or decreased  
322 entropy ( $\delta$ ). The product of the mechanistic contribution,  $K_{ij}$ , and the track volume of the recipient  
323 phenotype,  $V_j$ , is proportional to the probability of a mutation from donor phenotype  $i$  to recipient phenotype  
324  $j$ .

325 Second, the normalized probability of a mutation from donor phenotype  $i$  to recipient phenotype  $j$   
326 along a track variable is written

$$327 \quad k_{ij} = K_{ij} V_j / \left( \sum_{j=1}^{n_i} K_{ij} V_j \right) \quad \sum_{j=1}^{n_j} k_{ij} = 1 \quad (2)$$

328 where  $n_j$  is the number of recipient phenotypes that phenotype  $i$  can reach by a single mutation of the  
329 mutated parameter under consideration.

330 The *phenotype-specific* mutation rate is proportional to the *general* mutation rate, represented by  
331 the parameter  $m$ . There is a great deal of variation in  $m$  among species and ecological contexts (Westra et  
332 al., 2017). In humans, mutations/base pair is estimated at  $\sim 10^{-8}$  per generation (Nachman & Crowell, 2000)  
333 and, assuming an average gene size of  $\sim 1000$  base pairs, this results in a general mutation rate  $m$  on the  
334 order of  $10^{-5}$  mutations/locus per generation. In *E. coli*, mutations/base pair is estimated at  $\sim 10^{-10}$  per  
335 generation (Foster, et al., 2015). Thus, for an average gene size, the estimated general mutation rate  $m$  is  
336 on the order of  $10^{-7}$  mutations/locus per generation. Matic et al. (1997) found that values for the *E. coli*  
337 mutation rate to drug resistance are typically in agreement with this figure ( $\sim 10^{-7}$ ), but they also found  
338 examples as high as  $\sim 10^{-5}$ . The values that might have been relevant for early periods of evolution are  
339 unknown, but likely to be on the higher end because of error-prone conditions thought to have prevailed at  
340 that time. This would be a relevant issue for our case study of a putative primordial circadian clock, which  
341 will be treated in **RESULTS**. We focus on spontaneous point mutations resulting from replication that are  
342 the major source of variation in a bacterium like *E. coli* (Foster, et al., 2015). The general mutation rate is  
343 subject to evolution in various contexts (Sniegowski et al., 2000; Raynes et al., 2018) and, as we will show  
344 for our clock model, the interaction of phenotype-specific mutation rates and near-neutral fitness effects  
345 (i.e., growth rates, as a measure of total fitness, are nearly equal for all phenotypes) results in different  
346 values of the general mutation rate that are optimal for individual phenotypes.

347 Finally, the *phenotype-specific* mutation rate constant  $m_{ij}$  between phenotypes  $i$  and  $j$  is given by  
348 the product of two factors  $mk_{ij}$ , where  $m$  is the *general* mutation rate constant given by the number of  
349 mutations per generation and  $k_{ij}$  is the probability of a specific transition from phenotype  $i$  to phenotype  $j$ .  
350 The production rate of a phenotype (mutant) in units of mutations/time is then the product of  $m_{ij}$  the  
351 phenotype-specific mutation rate constant,  $\gamma_i$  the *exponential growth rate constant* of the donor phenotype  
352 (related to the doubling time,  $\ln 2 / \tau_D$ ), and  $N_i$  the size of the donor population. Note that this differs  
353 from the conventional description in that the product  $mk_{ij}$  is typically represented by a single *specific* rate  
354 constant per generation (e.g., Levin et al., 2000; Reams et al., 2010) that is not predicted but measured or  
355 estimated for a particular mutant phenotype.

356

357

358

359

360 ***Population Dynamic Equations***

361  
362 To simplify the presentation, we restrict consideration to asexual haploid organisms in a spatially  
363 homogenous context growing in an exponential steady state, which is the most rigorously defined state for  
364 a cellular population (Maaløe & Kjeldgaard, 1966). Under these idealized conditions, all effective  
365 population sizes  $N_e$  are equal to the census population size  $N$ , mutants are never lost from the population,  
366 and the equilibrium distribution can be rigorously determined under non-selecting and selecting conditions.  
367 Lethal mutations ( $\sim 1\%$ ) can be subsumed within a net growth rate constant since there is evidence that  
368 these mutants occur by a first-order process (Robert et al., 2018). Of course, steady-state exponential  
369 growth cannot continue indefinitely. Nevertheless, results obtained under these conditions provide a  
370 rigorous reference or standard to which results under more realistic conditions can be compared, analogous  
371 to the historical role played by the frictionless plane in mechanics (Hawking, 2002) and by the Hardy-  
372 Weinberg law in population genetics (Crow, 1988; Wakeley, 2005). As with these idealizations, the  
373 intention is to get at something essential with the understanding that refinements will undoubtedly be added  
374 in the future; just as wind resistance and static friction were eventually added in mechanics and selection,  
375 drift and population structure were eventually added in population genetics. In each case, the expectation  
376 is that more realistic aspects will be added as the theory becomes refined. In **DISCUSSION** we will suggest  
377 methods to relax our assumptions.

378 The population dynamic equations for steady-state exponential growth can be written in terms of  
379 numbers for each of the  $n$  phenotypes in the population

380 
$$\frac{dN_i}{dt} = \sum_{\substack{j=1 \\ j \neq i}}^n mk_{ji} \gamma_j N_j - \sum_{\substack{j=1 \\ j \neq i}}^n mk_{ij} \gamma_i N_i + \gamma_i N_i \quad i = 1, \dots, n \quad (3)$$

381 The first sum is the rate of increase by mutation, the second sum the rate of loss by mutation, and the final  
382 term the rate of increase by net exponential growth, with  $\gamma_i$  in doublings per unit time. These equations  
383 have the undesirable feature that the population is continually increasing. However, by expressing the  
384 population numbers  $N_i$  as a fraction of the total population  $N_T$  (or relative frequency) the resulting  
385 equations have a more convenient form with a well-defined steady state. Thus, the relative frequency of  
386 phenotype  $i$  is

387 
$$R_i = N_i / \sum_{j=1}^n N_j \quad \text{and} \quad \sum_{i=1}^n R_i = 1 \quad (4)$$

388 Starting with the derivative of the relative frequency

$$389 \quad \frac{d(N_i / N_T)}{dt} = \frac{1}{N_T} \frac{dN_i}{dt} - \frac{N_i}{N_T} \frac{1}{N_T} \frac{dN_T}{dt} \quad (5)$$

390 substituting  $dN_i / dt$  from **Eqn. (3)**, and noting the cancelation of the mutation terms in  $dN_T / dt$ , we  
 391 obtain

$$392 \quad \frac{dR_i}{dt} = \sum_{\substack{j=1 \\ j \neq i}}^n mk_{ji} \gamma_j R_j - \sum_{\substack{j=1 \\ j \neq i}}^n mk_{ij} \gamma_i R_i + \gamma_i R_i - R_i \left( \sum_{j=1}^n \gamma_j R_j \right) \quad (6)$$

393 In anticipation of the case study to follow, we shall consider the situation in which phenotype  $k$  has growth  
 394 rate  $\gamma_k$  in a *non-selecting condition* and  $\gamma_k^*$  in a *selecting condition*. By adding and subtracting the same  
 395 terms, normalizing time  $t$  by  $\gamma_k$  ( $\tau = \gamma_k t$  in generations) and defining relative growth rates as  $\mu_i = \gamma_i / \gamma_k$   
 396 , **Eqn. (6)** can be rearranged and rewritten for phenotype  $k$  and for all other phenotypes  $i$  to emphasize three  
 397 separate contributions to their rate of change:

$$398 \quad \begin{aligned} \frac{dR_k}{d\tau} = & \left[ \left( \sum_{\substack{j=1 \\ j \neq k}}^n mk_{jk} \mu_j R_j \right) - \left( \sum_{\substack{j=1 \\ j \neq k}}^n mk_{kj} \mu_k R_k \right) + \left( \mu_k - \sum_{j=1}^n \mu_j R_j \right) R_k \right] \\ & - \left[ (\mu_k^* - 1) \left( \sum_{\substack{j=1 \\ j \neq k}}^n mk_{kj} R_k \right) \right] \\ & + \left[ (\mu_k^* - 1) (1 - R_k) R_k \right] \end{aligned} \quad (7)$$

$$399 \quad \begin{aligned} \frac{dR_i}{d\tau} = & \left[ \left( \sum_{\substack{j=1 \\ j \neq i}}^n mk_{ji} \mu_j R_j \right) - \left( \sum_{\substack{j=1 \\ j \neq i}}^n mk_{ij} \mu_i R_i \right) + \left( \mu_i - \sum_{j=1}^n \mu_j R_j \right) R_i \right] \\ & + \left[ (\mu_k^* - 1) mk_{ki} R_k \right] \quad i \neq k \\ & - \left[ (\mu_k^* - 1) R_k R_i \right] \end{aligned} \quad (8)$$

400 where the selection coefficient is defined as  $\mu_k^* - 1$ . If there are no fitness effects in the *non-selecting*  
 401 condition (all growth rates identical), then the form of the above equations in the *selecting* condition has  
 402 the meaning

$$403 \quad \begin{aligned} \text{Net Rate of Change} = & \text{Mutation} \\ 404 & + \text{Mutation-x-Selection} \\ 405 & + \text{Selection} \end{aligned} \quad (9)$$

406

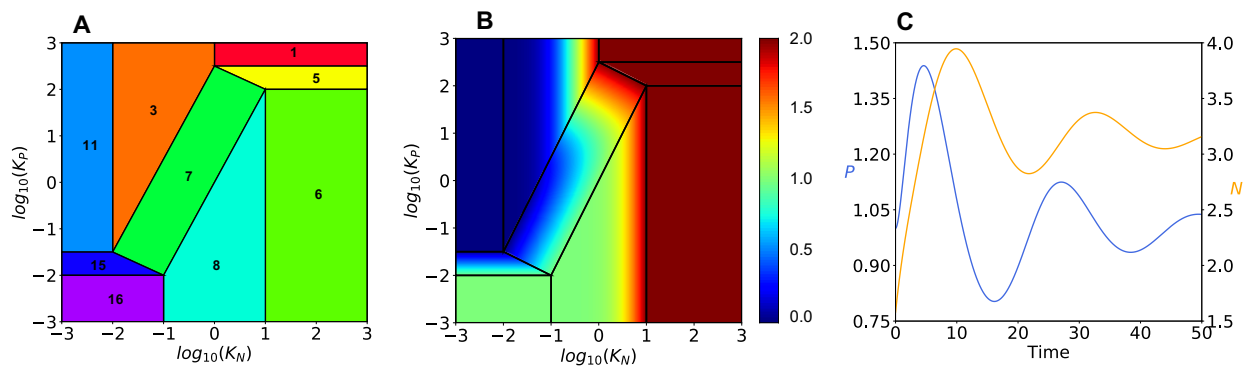

407

408 **Figure 2. Predicted phenotype characteristics in System Design Space.** (A) Visualization of phenotype  
409 regions. Region of oscillatory phenotype #7 is the central rectangular shape. (B) Steady state concentration  
410 of total protein (N+P) plotted  $\log_{10}$  as a heat map on the z-axis. (C) Validated oscillatory behavior for  
411 phenotype #7. Concentrations of activator P (left y-axis, Blue) and repressor N (right y-axis, Gold) as a  
412 function of time scaled by a factor of 1/3. Initial conditions are:  $mP=100$ ;  $P = 1.0$ ;  $mN = 3.16$ ;  $N = 1.58$ .  
413 Figures generated with the following parameter values:  $KN = 0.316$ ;  $KP = 1.78$ ;  $aN = 1.0$ ;  $aP = 0.01$ ;  
414  $amN_{max} = 10.0$ ;  $amN_{min} = 1.0$ ;  $amP_{max} = 10000.0$ ;  $amP_{min} = 1.0$ ;  $bN = 1.0$ ;  $bP = 1.0$ ;  $bmN = 1.0$ ;  $bmP$   
415  $= 1.0$ ; Kinetic order(s):  $n=2$ ,  $p=2$ ; (The parametric constraints  $amP_{max} > amP_{min}$  and  $amN_{max} > amN_{min}$   
416 are automatically satisfied by this parameterization of the model.)

417

418 The middle term involves mutations generated specifically by replication of the phenotype with the  
419 selective advantage; hence, it is the only term that involves both a mutation rate and the selection  
420 coefficient. The above equations can be considered one of several alternative forms of the standard  
421 population genetic equations (Wilke, 2005); however, the alternative form used here most clearly reveals  
422 the three distinct rate contributions we wish to consider.

423

## 424 RESULTS

425

426 The Design Space Toolbox 3.0 has algorithms for the automatic prediction of numerous characteristics  
427 within and between phenotypes. Examples of characteristics *within* phenotypes include the predicted  
428 volume (global robustness) of individual phenotypes, protein burden due to differential protein expression,  
429 dynamic behavior, and system design principles for the realization of the phenotype. Volumes are shown  
430 with identifying phenotype numbers in **Figure 2A**. There are numerous phenotypic characteristics that can  
431 be plotted on the z-axis as a heat map; an example is the protein burden of each phenotype due to differential  
432 protein expression in the non-selecting condition (**Figure 2B**). Simulation of the full system, with time  $t$   
433 scaled by a factor of 1/3 ( $\tau = t / 3$ ) to match a 24-hour cycle time, produces the results in **Figure 2C**,  
434 which validates the prediction of a damped oscillatory characteristic for phenotype #7.

435 Examples of characteristics that distinguish *between* phenotypes include phenotype-specific  
436 mutation rate constants and system design principles. The first example, involving phenotype-specific

437 mutation rate constants, distinguish between phenotypes in the context of the population dynamic model.  
438 In this model the focus is on the dynamics of the populations of organisms with the different phenotypes  
439 rather than the dynamics of the biochemical molecules of the system (oscillator). The second example,  
440 involving design principles, follows from the definition of a “qualitatively-distinct phenotype” as a  
441 combination of dominant processes operating within an intact biochemical system (Savageau et al, 2009).  
442 Phenotype #5 (signature 11 11 21 11 **11** 11) and phenotype #7 (signature 11 11 21 11 **21** 11) in **Table 1** are  
443 distinguished by a single change in dominance involving the rate of transcription of the mRNA for the  
444 activator (Bold digits in the signature). In our simplified case, allowing only the two equilibrium  
445 dissociation constants to vary by mutation, the condition is the following: Phenotype #5  $K_N K_P^2 > 316^2$   
446 and Phenotype #7  $K_N K_P^2 < 316^2$ . This suggests that a mutation increasing  $K_N$  alone by a sufficient  
447 amount can convert phenotype #7 to #5. In the more general context of distinguishing phenotype #7 from  
448 its neighbors, phenotype #7 in **Figure 2A** must be to the left of phenotypes #5 and #8 and to the right of  
449 phenotypes #3 and #15. The result is not at all obvious or intuitive, rather it is a subtle *system design*  
450 *principle* (Savageau & Fasini, 2009; Savageau, 2013) defined by four boundaries (**Supplemental**  
451 **Information, Section S10**). Thus, all system parameters must satisfy constraints involving specific  
452 constellations of values with many opportunities for compensation; there is no single parameter capable of  
453 distinguishing between phenotypes. This is particularly apparent in the case of complex diseases for which  
454 many genes and parameters interact in subtle ways that are difficult to identify; there is no single effective  
455 target for treatment, rather there are many potential targets with a spectrum of effectiveness.

456 Small changes, in the limit of linearization, within a phenotypic region eliminates the possibility of  
457 epistatic interactions. Larger changes, but still within a phenotypic region, can account for a variety of  
458 epistatic interactions. For example, the simple conditions in the previous paragraph show an epistatic  
459 interaction between two mutations with one affecting  $K_N$  and the other affecting  $K_P$ . This is clear from  
460 the fundamental product of power law nonlinearities found in biochemical kinetics. Moreover, with  
461 changes large enough to move the system from one qualitatively distinct phenotypic region to another,  
462 nearly any type of epistatic interaction can be realized.

463

#### 464 *Fixing Two Free Parameters*

465

466 Two features that any population model should capture are that “large-effect” mutations are rare whereas  
467 “small-effect” mutations are abundant in well adapted systems (Bataillon & Bailey, 2014; Tataru et al.,  
468 2017; Bondel et al., 2019; Templeton, 2021) and detrimental mutations outnumber beneficial ones.



469 Although there are exceptions, which we discuss later, these two features must be considered in the context  
470 of our model before we can predict phenotype-specific mutation rate constants and fitness effects.

471 Although terms such as large-, small-, zero-, positive-, and negative-effect are often applied to  
472 mutations in describing their effects on *fitness*, these terms only apply to populations in a given  
473 environment. With a change in environment the same mutation can have a different, indeed often an  
474 opposite, effect on fitness (Templeton, 2021). This is because fitness is a property of the phenotype, which  
475 in turn is a function of both genotype and environment. To separate these issues, we use the terms “size  
476 scale” (i.e., whether the change in value of a kinetic parameter caused by mutation is large or small) and  
477 “directional bias” (i.e., whether parameter change caused by mutation is in the direction of increasing or  
478 decreasing entropy) to characterize mutations without regard to fitness. Fitness is then a function of the  
479 phenotype and not of the mutation per se. This separation has the advantage of allowing us to characterize  
480 the frequency distribution of phenotypes under non-selecting and selecting conditions.

481 In our theoretical framework, we account for the size scale and directional bias of mutations with  
482 an exponential distribution having scale factor  $\lambda$  and directional bias parameter  $\delta$  that increases or decreases  
483 the effective scale factor. Unlike the other parameters in our theoretical framework, these two must be  
484 estimated from experimental data. For this purpose, we draw upon the best studied specific function in  
485 molecular biology, LAC repressor binding to its recognition sites in the DNA of *E. coli*. Markiewicz et al.  
486 (1994) generated ~4000 protein variants by making substitutions at each amino acid position. After being  
487 transformed through the molecular mechanisms that provide the causal connection between the gene  
488 sequence and the integrated function of the *lac* system, a corresponding distribution of phenotypes was  
489 determined. As Markiewicz et al. (1994) showed, there are essentially three qualitatively-distinct  
490 phenotypes involving LAC binding: (1) the inducible “wild-type”, (2) non-inducible constitutive, and (3)  
491 non-inducible super-repressed. Under the conventional laboratory conditions used to detect these three  
492 phenotypes, the data in their figure 1 show that changes at ~ 67% of the positions were tolerant to  
493 substitutions (no change in DNA binding), 31% were intolerant with an increase in binding entropy  
494 (decrease in DNA binding), and ~2% were intolerant with a decrease in entropy (increase in DNA binding).

495 In our prediction of phenotypes resulting from mutations in the N gene of the clock model, there  
496 are three analogous qualitatively-distinct phenotypes: the oscillatory “wild type”, the non-oscillatory  
497 constitutive, and non-oscillatory super-repressed (**Figure S6**). Values of  $\lambda=0.6$  and  $\delta=1.85$  provide the best  
498 fit to the experimental data and the predicted distribution of fitness effects in this case is ~ 67% oscillatory  
499 (wild-type DNA binding), ~ 31% non-oscillatory constitutive (decreased DNA binding), and ~ 2% non-  
500 oscillatory super-repressed (increased DNA binding). This distribution of effects is likely to be similar for  
501 other proteins at least qualitatively. For example, Markiewicz et al. (1994) examined the sequence  
502 alignment of proteins in the LAC family of proteins (which includes proteins of unrelated function in

503 addition to other transcription factors) and found that 61% of the residues were not conserved (tolerant of  
504 evolutionary changes) and 39% were conserved (intolerant of evolutionary changes). In view of the  
505 different percentages of non-conserved and conserved residues being similar in a variety of unrelated  
506 proteins, fitting values of the  $\lambda$  and  $\delta$  to these percentages is likely to be appropriate for other systems as  
507 well.

508 To summarize, there are two free parameters in this model,  $\lambda$  and  $\delta$ , that must be estimated from  
509 experimental data. Based on the above considerations, we assign the following model values for these two  
510 parameters:  $\lambda=0.6$  and  $\delta=1.85$ . All the remaining parameters have values predicted solely based on the  
511 underlying mechanistic model using methods from the Design Space Toolbox (Valderrama-Gómez et al,  
512 2020), as described in the following sections.

513

### 514 *Phenotype-Specific Mutation Rate Constants*

515

516 In what follows we predict the equilibrium distribution of phenotype diversity under non-selecting  
517 conditions in three stages to clearly distinguish different contributions. First, we consider the idealized case  
518 in which there is no size scale or directional bias for mutations that have neutral fitness effects and show  
519 that the distribution differs from the expectation of a uniform distribution. Second, we add size scale and  
520 directional bias and find that the distribution exhibits an increasing gradient from phenotypes with low  
521 entropy to those with high entropy. Third, as a specific example involving phenotypes with mixed fitness  
522 effects, we consider their protein burdens to obtain a distribution with a central peak resulting from *entropy*  
523 *– selection balance*. It should be noted that this type of balance is different from other types of specific  
524 mutation – selection balance (Barton, 2007; Lynch, 2010; Orlenko et al., 2016) and the general mutation –  
525 selection balance that always exists at equilibrium. Finally, we illustrate the shift in the distribution when  
526 the oscillatory phenotype is subject to various degrees of selection.

527

### 528 *Distributions for Neutral Mutations Without Size Scale or Directional Bias Effects*

529

530 Neutral mutations without size scale or directional bias effects produce a uniform distribution of values in  
531 parameter space; however, the partitioning of design space, which is dictated by the architecture of the  
532 underlying molecular system, results in an equilibrium distribution of phenotype frequencies that is  
533 determined by the normalized values of the phenotypic volumes (**Figure 3A, Blue**), as obtained  
534 analytically. Large volumes (e.g., phenotype #6) imply robust phenotypes that are tolerant to large changes  
535 in parameter values; small volumes (e.g., phenotype #15) imply fragile phenotypes that are easily disrupted  
536 by small changes. The absence of size scale and directional bias is of course an idealization, but useful for

537 identifying the volume contribution and providing a baseline on which to characterize more realistic  
 538 features, as described below.

539

540 **Distributions for Neutral Mutations with Size Scale and Directional Bias Effects**

541

542 In the presence of size scale and directional bias effects ( $\lambda = 0.6$  and  $\delta = 1.85$ ), the equilibrium distribution  
 543 exhibits a gradient from phenotypes with lower entropy (lower left corner in **Figure 2A**) toward phenotypes  
 544 with higher entropy (upper right corner in **Figure 2A**), as obtained numerically from the steady state  
 545 solution of the population dynamic equations and shown in **Figure 3A** (Black). Note that the phenotype  
 546 with highest entropy, based on directional bias, is phenotype #1, which corresponds to mutations in both  
 547 transcription factors that essentially eliminates the ability to recognize their DNA binding sites.  
 548 Conversely, the phenotype with the lowest entropy, based on directional bias, is phenotype #16,

549

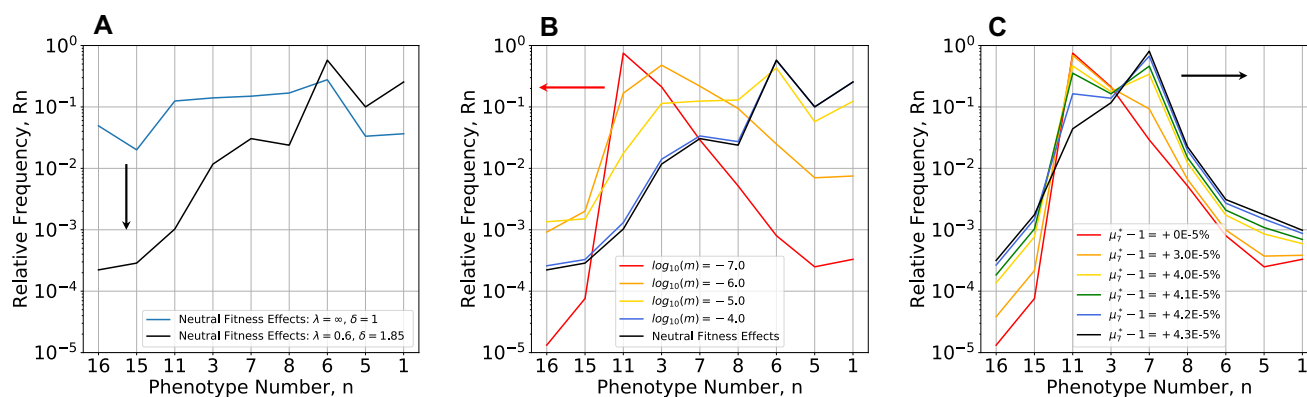

550

551 **Figure 3. Equilibrium distributions of phenotype diversity.** Mutational entropy is increasing from left  
 552 to right, from the phenotype with both equilibrium dissociation constants having the lowest values  
 553 (phenotype #16) to that with both having the highest values (phenotype #1). **(A) Mutations with neutral**  
 554 **fitness effects (all  $\mu_i = 1$ ) under non-selecting conditions (Blue)** in the absence of size scale ( $\lambda \rightarrow \infty$ )  
 555 and directional bias ( $\delta = 1$ ), and shifted down (Black) in the presence of size scale ( $\lambda = 0.6$ ) and  
 556 directional bias ( $\delta = 1.85$ ). In the absence of directional bias there is a minimal gradient; whereas this  
 557 gradient is approximately 4-orders of magnitude when directional bias is present. **(B) Mutations with**  
 558 **mixed fitness effects ( $\mu_i$  different) under non-selecting conditions** in the presence of size scale ( $\lambda = 0.6$   
 559 ) and directional bias ( $\delta = 1.85$ ). The distribution is shifted to the left with decreasing values of  $m = 10^{-4}$   
 560 (Blue),  $10^{-5}$  (Yellow),  $10^{-6}$  (Orange) and  $10^{-7}$  (Red) compared with the strictly neutral results in (Black).  
 561 The distribution changes dramatically, increasing, reaching a peak, and then decreasing when directional  
 562 bias is present. Fitness effects normalized with respect to the experimental data for *E. coli*  $\beta$ -galactosidase  
 563 burden. **(C) Mutations with mixed fitness effects ( $\mu_i$  different) under selecting conditions with**  
 564 **various degrees of selection.** The peak of the distribution under the non-selecting conditions ( $m = 10^{-7}$ )  
 565 shifts to the right, from phenotype #11 (non-oscillatory, Red) to phenotype #7 (oscillatory, Black) and its  
 566 frequency increases with increasing values of the selection coefficient whereas the frequency of the other  
 567 phenotypes decrease according to their selective disadvantage.

568 which corresponds to mutations in both transcription factors that makes for overly tight binding. The  
569 gradient in this case is approximately 4-orders of magnitude.

570

### 571 *Distributions for Mixed Mutations with Size Scale and Directional Bias Effects*

572

573 In the non-selecting constant light environment, in which mutants are assumed to exhibit fitness differences  
574 unrelated to the specific phenotype characteristic of oscillation, the equilibrium distribution is among  
575 mutations with mixed fitness effects, positive, negative and neutral. As an example of a phenotype-specific  
576 fitness characteristic that can be predicted, we consider the size of the protein coding regions and the protein  
577 burden of extraneous protein expression for each phenotype.

578 Experimental evidence in the case of *lac* operon expression in *E. coli* suggests that inappropriate  
579 constitutive expression (nevertheless within the normal range for expression of the wild-type induced state)  
580 decreases the growth rate by  $< \sim 0.1\%$ . (Koch, 1983). The decrease would be even less if we consider only  
581 the contribution from  $\beta$ -galactosidase, and neglecting that from the permease and transacetylase, in making  
582 estimates for our clock module. Given the 10-fold larger size of the  $\beta$ -galactosidase monomer, its tetrameric  
583 structure and the 1000-fold protein burden (difference between wild-type uninduced expressed and mutant  
584 constitutive expression), compared to the assumed 100 amino acid length, dimer structure and predicted  
585 100-fold protein burden for our molecular model, allows the appropriately scaled decrease in growth rate  
586 to be  $< \sim 0.001\%$ . The following relative growth rates (selection coefficients) for each phenotype, relative  
587 to phenotype #7 in the non-selecting condition, follow from the predicted levels of protein expression for  
588 each phenotype (**Figure 3B**):  $\mu_1 = 0.999997573$  (-2.43E-04 %),  $\mu_3 = 1.000000322$  (3.22E-05 %),  $\mu_5 =$   
589  $0.999997527$  (-2.47E-04 %),  $\mu_6 = 0.999997357$  (-2.64E-04 %),  $\mu_7 = 1.0$  (0 %),  $\mu_8 = 0.999999693$  (-  
590  $3.07E-05$  %),  $\mu_{11} = 1.000000412$  (4.12E-05 %),  $\mu_{15} = 1.000000115$  (1.15E-05 %), and  $\mu_{16} = 0.99999976$   
591 (-2.40E-05 %). Note that these small differences in growth rate that are undoubtedly overestimates would  
592 be considered neutral, given the technical limitations of experimentally determining growth rate differences  
593 less than  $\sim 0.1\%$  (Gallet et al., 2012).

594 When both size scale and directional bias effects are present, the graded distribution in the strictly  
595 neutral case (**Figure 3A,B**, Black) is dramatically changed to a peaked distribution that is increasingly  
596 weighted to the left (**Figure 3B Orange, Red**) as the general mutation rate is decreased. The result is what  
597 might be called *entropy-selection balance*.

598 Note that all the distributions in **Figure 3A** and **3B** occur under the *non-selecting condition with*  
599 *respect to the oscillatory* phenotype characteristic. Moreover, despite the difficulty distinguishing between  
600 mutations with neutral fitness effects and mutations without detectable fitness effects, these results show

601 that the equilibrium distributions are radically different. It is also clear that there is an optimal value for  
602 the general mutation rate that favors each phenotype.

603

### 604 *Equilibrium Distribution of Phenotype Diversity Under the Selecting Condition*

605

606 When connections to both the synchronizing environmental signal and the integrated cellular biochemistry  
607 are made by a critical new mutation, it would confer no selective advantage if it were to occur in one of the  
608 phenotypic regions that lack the ability to oscillate. For example, it has the highest probability of occurring  
609 in phenotype #11 because its frequency in the population is nearly 100% before the mutation occurred.  
610 More rarely, it would occur in the region of phenotype #7, but then there would be the potential to  
611 synchronize with the light-dark environment (the selecting condition) and have a selective advantage. The  
612 predicted equilibrium distribution of phenotype diversity under the selecting condition as a function of the  
613 selection strength is shown in **Figure 3C**. Beyond a critical level of selection, the peak of the equilibrium  
614 distribution shifts from phenotype #11 to phenotype #7. Although we cannot currently predict the fitness  
615 of phenotype #7 under selecting conditions, if it were possible to estimate the distribution of phenotype  
616 diversity, then one could back calculate the selection strength that produces the best fit to the estimated  
617 distribution (**Supplemental Information, Section S11**).

618 The three separate contributions to the rate of change in phenotype frequency in the neutral case  
619 (**Eqn. 9**, mutation, mutation-x-selection, and selection) are shown in **Figure 4** as a function of selection

620

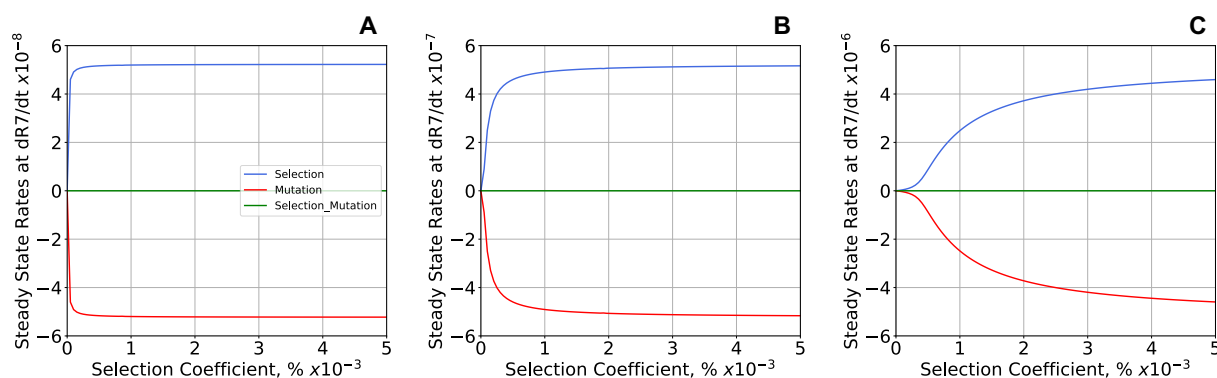

621

622 **Figure 4. Three separate contributions to the steady-state rate of change in frequency for the**  
623 **oscillatory phenotype #7.** The three panels show results for mutations with neutral fitness effects and  
624 general mutation rate  $m = 10^{-7}$  (A),  $m = 10^{-6}$  (B), and  $m = 10^{-5}$  (C). The contributions (**Eqn. 9**) are shown  
625 as a function of selection strength at equilibrium. Selection alone (Blue) is balanced with mutation alone  
626 (Red); the contribution by mutation-x-selection (Green) is negligible for the strengths of selection shown.  
627 The maximum rates of change are proportional to the general mutation rate (note the change of scales), and  
628 stronger selection is required to overcome the effects of higher general mutation rates.  
629

630 strength and general mutation rate. The rate of change at equilibrium is equal to zero and the contributions  
631 of mutation alone and selection alone are nearly opposite and equal. The contribution from mutation-x-  
632 selection is negligible at the selection strengths shown. Note the differences in scale: the maximum  
633 contribution to the rate at equilibrium is proportional to the general mutation rate, and the degree of selection  
634 necessary to achieve the maximum rate increases rapidly with the general mutation rate.

635

### 636 *Non-Equilibrium Distribution of Phenotypes Under the Selecting Condition*

637

638 In this and the following subsection, instead of determining the phenotype distribution at equilibrium under  
639 either the non-selecting or selecting condition, we determine the temporal changes in distribution between  
640 the two equilibria – from non-selecting to selecting or from selection to non-selecting. The light-dark  
641 environment generates the selecting condition. The ability to synchronize with the light-dark environment  
642 generates a selective advantage for the oscillatory phenotype (#7) greater than that of the other phenotypes.  
643 Aside from #7, all the other phenotypes have either a mixed distribution or a neutral distribution of fitness  
644 effects.

645 Results with a neutral distribution of fitness effects for phenotypes other than #7 are shown in  
646 **Figure 5A**, starting from the equilibrium distribution under the non-selecting condition (**Figure 3A,B:**  
647 Black) and evolving to the equilibrium distribution under the selecting condition (selection coefficient  $\mu_7^*$   
648 - 1 = 6.0E-3 %, all other  $\mu_i = \mu_7$  and fixed). Phenotype #7 increases rapidly with a time scale dominated  
649 by selection, while there is little change in the other phenotypes until  $\sim 5.0E+04$  generations (**Figure 5A,**  
650 vertical dashed line). After this point, phenotype #7 approaches its maximum at  $\sim 1.5E+05$  and all other  
651 phenotypes slowly decrease asymptotically toward the new equilibrium distribution with a time scale  
652 dominated by mutation. There are no changes in the ranking of phenotype frequencies in the population  
653 after  $3.5E+05$  generations.

654

### 655 *Non-Equilibrium Distribution of Phenotypes with Removal of the Selecting Condition*

656

657 Experimental studies have explored the evolutionary loss of phenotypes in response to the relaxation of  
658 selection. For example, the ability of *Bacillus subtilis* to sporulate is lost when it is no longer under selection  
659 (Maughan et al., 2007). In the clock model, relaxation of selection occurs when the selective advantage of  
660 phenotype #7 is removed (switched to constant light) and the population returns with time to the equilibrium  
661 distribution under the non-selecting condition.

662

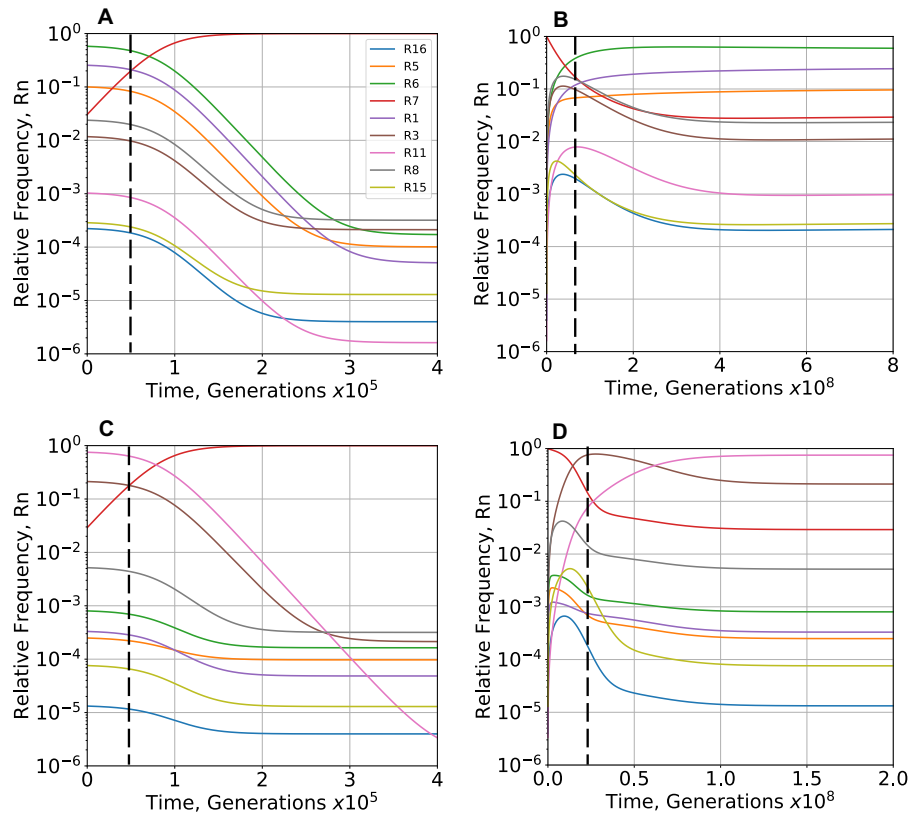

663

664 **Figure 5. Temporal response in relative frequency of phenotypes following imposition and removal**  
 665 **of the selecting condition. (A,B) Neutral distribution of fitness effects. (A)** The increase of phenotype #7  
 666 **(Red)** is accompanied initially by very little change in the other phenotypes, followed (after the dashed line)  
 667 by a slow decrease in all other phenotypes. All changes in the rank of the relative frequencies occur before  
 668  $3.5E+05$  generations. **(B)** The decrease of phenotype #7 **(Red)** is accompanied initially by a rapid increase  
 669 in all other phenotypes, a peak (the last occurring at the dashed line) followed by a slow decrease in all  
 670 other phenotypes except for phenotype #1, #5 and #6, which continue to increase slowly. All changes in  
 671 the rank of the relative frequencies occur before  $2.5E+08$  generations. The overall response is  $\sim 1000$ -times  
 672 slower than **(A)**. **(C,D) Mixed distribution of fitness effects. (C)** The increase of phenotype #7 **(Red)** is  
 673 accompanied initially by very little change in the other phenotypes, followed (after the dashed line) by a  
 674 slow decrease in all other phenotypes. All changes in the rank of the relative frequencies occur before  
 675  $4.0E+05$  generations. **(D)** The decrease of phenotype #7 **(Red)** is accompanied initially by a rapid increase  
 676 in all other phenotypes, a peak (the last occurring at the dashed line) followed by a slow decrease in all  
 677 other phenotypes except for phenotype #11, which continues to increase. All changes in the rank of the  
 678 relative frequencies occur before  $6.3E+07$  generations. The overall response is  $\sim 400$ -times slower than  
 679 **(C)**. Imposition occurs by a change from a non-selecting ( $\mu_7^* = 1.0$ ) to a selecting ( $\mu_7^* = 1.00006$ )  
 680 environment and removal by the reverse. The general mutation rate  $m = 10^{-7}$ .  
 681

682 Results with a neutral distribution of fitness effects for phenotypes other than #7 are shown in  
 683 **Figure 5B**, starting from the equilibrium distribution under the selecting condition (selection coefficient  
 684  $\mu_7^* - 1 = 6.0E-3$  %, all other  $\mu_i = \mu_7$  and fixed) and evolving to the distribution under the non-selecting  
 685 condition (**Figure 3A,B**: Black). The large number of the selected phenotype (#7) in the initial equilibrium

686 distribution is rapidly lost and redistributed to all the other phenotypes within  $\sim 7.5E+07$  generations. There  
687 is a subsequent slow redistribution and decrease among all the phenotypes except #1, #5 and #6 (high  
688 entropy phenotypes) until a new equilibrium distribution is approached asymptotically with a time scale  
689 dominated by mutation. There are no changes in the ranking of phenotype frequencies in the population  
690 after  $\sim 2.5E+08$  generations. Comparison of the time scales in **Figure 5A and B** shows that the response  
691 to the removal of selection is approximately  $\sim 1000$ -times slower than that to the imposition of selection.

692 Results with a mixed distribution of fitness effects for phenotypes other than #7 are shown in  
693 **Figure 5D**, starting from the equilibrium distribution under the selecting condition (selection coefficient  
694  $\mu_7^* - 1 = 6.0E-3$  %, all other  $\mu_i$  determined by protein burden and fixed) and evolving to the distribution  
695 under the non-selecting condition (**Figure 3B**: red). The large number of the selected phenotype (#7) in  
696 the initial equilibrium distribution is rapidly lost and redistributed to all the other phenotypes within  $\sim$   
697  $2.5E+07$  generations. There is a subsequent slow redistribution and decrease among all the phenotypes  
698 except #11 (low entropy phenotype) until a new equilibrium distribution is approached asymptotically with  
699 a time scale dominated by mutation. There are no changes in the ranking of phenotype frequencies in the  
700 population after  $\sim 6.3E+07$  generations. These results are in qualitative agreement with those of Maughan  
701 et al. (2007) when the larger target size of the sporulation machinery and the higher mutation rate of their  
702 mutator strain are considered. Comparison of the time scales in **Figure 5C and D** shows that the response  
703 to the removal of selection is approximately  $\sim 400$ -times slower than that to the imposition of selection.

704 The large differences in time scale indicate that alternating between equal periods in selecting and  
705 non-selecting environments before reaching equilibria would lead not to an average of the two distributions  
706 but to a distribution closer to that in the selecting environment, which is reminiscent of “conflict between  
707 selection in two directions” (Haldane & Jayakar, 1963).

708

## 709 EXPERIMENTAL IMPLICATIONS

710

711 There are two major challenges in determining the distribution of phenotypes available for selection to act  
712 upon. One is the time of sampling relative to the evolutionary dynamics of natural populations and the  
713 second is technical limitations in the ability to identify and measure phenotypes. Both help to explain the  
714 pessimism expressed by Charlesworth (1996) in determining the distribution of the phenotypes and their  
715 fitness characteristics in natural populations.

716 Experimental studies based on mutants constructed from a highly evolved system (wild type) in a  
717 given environment (in the extreme, optimized according to Fisher’s Geometric model) may have only a  
718 very narrow distribution of alternative phenotypes capable of improvement in that environment. Those  
719 based on mutants constructed from a system that is far from its optimal state in a new environment, are



720 likely to offer a more fertile distribution of phenotypes capable of improvement. Indeed, Matuszewski et  
721 al. (2014) pointed out a violation of Fisher's prediction that mutations of small effect are the primary raw  
722 material of adaptive evolution. They considered a geometric model like Fisher's but with environmental  
723 change. In contrast to Fisher's predictions, larger adaptive steps often occur with a moving optimum.  
724 Mutations of small effect are not always the main material of adaptive change even when there is a single  
725 adaptive optimum, albeit a moving one. However, determining the natural distribution from subsequent  
726 measurements depends on the time of sampling following the construction, with the actual distribution of  
727 fitness effects bounded by two extremes: sampling at time zero and sampling at the time to reach  
728 equilibrium. The time zero sample has not involved any exchange; thus, it simply reflects the construction  
729 and may have little to do with any subsequent distribution in nature. The equilibrium sample in some cases  
730 might be the more relevant distribution in nature, but there is insufficient time to test this in practice. Thus,  
731 the natural distribution undoubtedly lies somewhere between these extremes. There is the additional  
732 difficulty of identifying the phenotypes because of technical limitations. Experimental studies based on  
733 natural variants face the same two challenges.

734 Orr (2005) also identifies challenges in two related problems. "The first is the current theory is  
735 limited in several ways – all the models that have been mentioned rest on important assumptions and  
736 idealizations. Although they are reasonable starting points for theory, none of these assumptions is  
737 necessarily correct and changing any might well change our predictions. [...] The second problem concerns  
738 testability. The difficulty is practical, not principled. Whereas current theory does make testable  
739 predictions, the effort required to perform these tests is often enormous (particularly as the theory is  
740 probabilistic, making predictions over many realizations of adaptation). Given, for example, the inevitable  
741 and often severe limits on replication in microbial evolution work, we can usually do no more than test  
742 qualitative predictions." Our theory is grounded in measurable biochemical parameters, and thus a different  
743 set of assumptions and idealizations need experimental testing.

744

#### 745 *Experimental Evolution Studies in a Chemostat*

746

747 The equilibrium distributions of phenotype diversity under selecting and non-selecting conditions can be  
748 approximated experimentally by growing populations in a chemostat/turbidostat (Bustos & Golden, 1992;  
749 Gresham & Jong, 2015). This allows us to relax the assumptions concerning the ideal context. If a one-  
750 liter chemostat is initialized with a single cell and the population grows exponentially until reaching typical  
751 densities of  $10^8$  to  $10^{10}$  cells/ml (Gresham & Jong, 2015), at this point nearly all phenotypes will be present  
752 in the population (**Figure 6**). If the flow of fresh media into the chemostat is initiated at this point, the  
753 doubling of the population in each subsequent generation due to growth coupled with the 50% reduction in

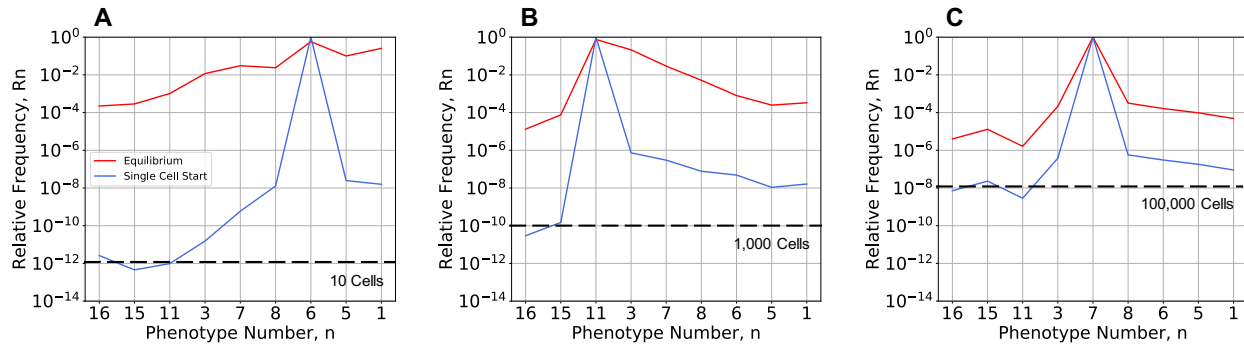

754

755 **Figure 6. Non-equilibrium distributions of phenotype diversity under non-selecting and selecting**  
 756 **conditions after exponential grow from one to  $10^{13}$  cells.** Cells with general mutation rate  $m = 10^{-7}$   
 757 are inoculated into fresh media in a one-liter chemostat without flow. **(A)** Under non-selecting conditions with  
 758 neutral fitness effects, phenotypes with the lowest frequency (#11, #15 and #16) are expected to have  $\sim 10$   
 759 cells in the chemostat. **(B)** Under non-selecting conditions with a protein burden spectrum of fitness effects,  
 760 phenotypes with the lowest frequency (#15 and #16) are expected to number  $\sim 1000$  cells. **(C)** Under  
 761 selecting conditions with a protein burden spectrum of fitness effects, nearly all phenotypes are expected  
 762 to be present at more than  $\sim 100,000$  cells. Size scale effects and directional bias effects are present in all  
 763 cases. The initial distribution (Blue) can be expected to approach the equilibrium distribution (Red)  
 764 asymptotically with time following long-term exponential growth with the flow of fresh media to the  
 765 chemostat.

766

767 population size per generation due to dilution will introduce fluctuations in the numbers of cells.  
 768 Phenotypes with a low frequency must be treated stochastically when the differences between effective  
 769 population size and the census population size become significant. All other phenotypes are expected to  
 770 persist in the chemostat.

771 Under non-selecting conditions, the case with neutral fitness effects is the most difficult. At the  
 772 time when the chemostat reaches the full operating density, all phenotypes in the population will be present  
 773 with a significant frequency except for #11, #15 and #16 ( $\sim 10$  cells in **Figure 6A**). The issue of genetic  
 774 drift could be introduced here by the addition of stochastic changes (replication or removal) in each  
 775 generation. In the case of mixed fitness effects due to protein burden, even those phenotypes with the  
 776 smallest frequency will have a census size of  $\sim 1000$  cells (**Figure 6B**). Under selecting conditions, at the  
 777 time when the chemostat reaches the full operating density, even those phenotypes with the smallest  
 778 frequency will have a census size of  $\sim 100,000$  cells (**Figure 6C**).

779

### 780 *Measuring Qualitatively Distinct Phenotypes*

781

782 Although current experimental limitations make it difficult to measure individual phenotypes, there are  
 783 some cases in which relevant aggregate phenotypes can be measured. In the classic studies of Markiewicz  
 784 et al. (1994), the authors constructed a collection of LAC mutants, measured their  $\beta$ -galactosidase

785 expression, grouped the results into qualitatively-distinct phenotypes (constitutive, super-repressed or  
786 inducible), and determined the resulting distribution of phenotypes *measured at time zero*. They found 2%  
787 super-repressed, 67% inducible, and 31% constitutive. This is not surprising, given a low mutation rate ( $m$   
788 =  $10^{-7}$ ) and that the construction started with the highly evolved and presumably fit *lac* system of *E. coli*.

789 Fluorescently tagged protein might be an updated approach for other proteins. In our case study,  
790 measuring the activity of the N gene protein and classifying the results as constitutive (phenotypes #6 and  
791 #8), super-repressed (phenotypes #3 and #11) or oscillatory (phenotype #7) leads to the following  
792 predictions. In analogy with the LAC studies, and sampling the distribution at time zero, our results would  
793 match those of Markiewicz et al. (1994) because these values were used to fit the two free parameters of  
794 our model  $\lambda$  and  $\delta$ . The distribution of phenotypes measured after reaching equilibrium under non-selecting  
795 conditions (loss of selection) with *neutral fitness effects* is predicted to be 2% super-repressed, 5%  
796 oscillatory and 93% constitutive (**Figure 7A**,  $\mu_7^* = 1$ ). This reflects the dominant influence of entropy.  
797 The distribution of phenotypes measured after reaching equilibrium under non-selecting conditions with  
798 *mixed fitness effects* based on protein burden is predicted to be 96% super-repressed, 3% oscillatory and  
799 1% constitutive (**Figure 7B**,  $\mu_7^* = 1$ ). Under selecting conditions, the degree of selection required to reach  
800 a distribution with 60% oscillatory phenotype with mixed fitness effects is four-fold greater than that with  
801 neutral fitness effects. These differences, suggesting that the results with a neutral distribution of fitness  
802 effects can be achieved more easily than with the protein burden distribution, might be relevant for the  
803 evolution of LAC repressor as well. Furthermore, an examination of different values for the general  
804 mutation rate,  $m$ , at equilibrium with mixed fitness effects shows that even when the relative frequency of  
805 the oscillatory phenotype is maximum at  $m = 3 \times 10^{-6}$ , the results are still very different from that of wild-  
806 type LAC repressor selected in nature (**Supplemental Information, Section S11, Figure S7**).

807 Testing such predictions would require finding rare cells in the population, at the limit of detection  
808 for many methods. Based on the start of a chemostat experiment as described in the previous section, the  
809 effluent at any subsequent time during the experimental evolution could be collected and the cells subjected  
810 to counting or sorting. Counting might well be able to determine the numbers of rare cells, sorting would  
811 allow sufficient material for further experimental tests. A double-sieve strategy would have advantages.  
812 First, the cells are grown under *non-selecting* conditions and sorted into two abundant classes, those with  
813 constitutive and non-constitutive expression. Second, the sorted cells with non-constitutive expression are  
814 grown under *selecting* conditions and sorted into those enriched for super-repressed and wild-type  
815 expression. This approach would require  $\sim 10^{10}$  cells to be collected and sorted within a reasonable amount  
816 of time and cost, which should be feasible with recent advances in high-throughput sorting methods (Fan  
817 et al., 2013; Zhukov et al., 2021).

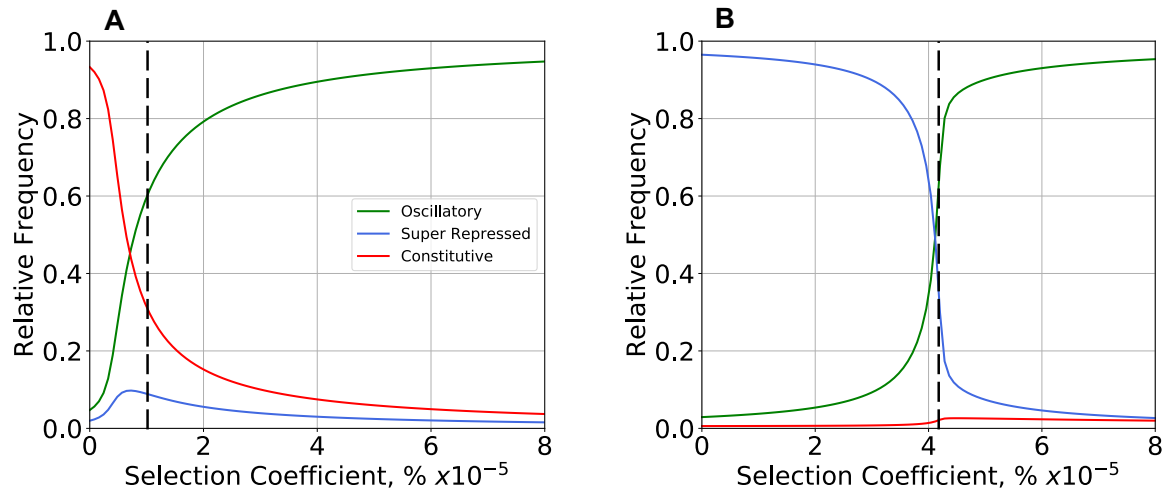

818

819 **Figure 7. Equilibrium distributions of qualitatively distinct phenotypes under selecting conditions**  
 820 **with various degrees of selection.** Comparisons made with general mutation rate  $m = 10^{-7}$  and (A) neutral  
 821 fitness effects (all  $\mu_i = 1$ ), and (B) a protein burden spectrum of fitness effects ( $\mu_i$  different) under non-  
 822 selecting conditions ( $\mu_7^* = 1$ ). The degree of selection required to reach a distribution with 60% oscillatory  
 823 phenotype (dashed line) with mixed fitness effects is  $\sim$  four-fold greater than that with neutral fitness  
 824 effects. The second most common phenotype is super-repressed with mixed and constitutive with neutral  
 825 fitness effects. Thus, only the results predicted in in (A) match the experimental results of Markiewicz et  
 826 al. (1994).

827

## 828 DISCUSSION

829

830 Two complex and interrelated issues in evolution are the *distribution of phenotype diversity*, which offers  
 831 opportunities for innovation, and the *interaction of phenotype-specific mutation rates and phenotype-fitness*  
 832 *differences*, which determines population dynamics and the subsequent evolution of the population. Some  
 833 experimental approaches to determining the distribution of mutant effects only address large effect  
 834 mutations because there are technical limitations to the size of changes in growth rate that can be measured  
 835 (Gallet et al., 2012). Others only address small effect mutations in the context of nearly-neutral theory  
 836 (Kimura, 1983; Ohta, 1992). As Bondel, et al. (2019) pointed out, together the two provide a bigger picture  
 837 by complementing one another. However, neither of these approaches deal with the causal linkages  
 838 between genotype/environment and phenotype.

839 There are few examples attempting to determine the distribution of mutant effects by addressing  
 840 the mechanistic link. Orlenko et al. (2016; 2017) have examined linear pathways in which classical  
 841 Michaelis-Menten kinetics were assumed, kinetic parameters were sampled, and the system of ordinary  
 842 differential equations was repeatedly solved. They found a lack of evolutionarily stable rate limiting steps  
 843 in large stable populations (Orlenko et al., 2016) but stable patterns of limiting steps in some cases of

844 fluctuating environments and population sizes (Orlenko et al., 2017). They note that more complex realistic  
845 systems remain to be studied in this context. Examples include systems involving more complex forms of  
846 regulation, enzyme-enzyme complexes and cascades, as well as branched and cyclic pathways. Loewe &  
847 Hillston (2008) focused on a simple limit cycle model for circadian rhythms (Leloup, et al., 1999) with a  
848 set of assumed parameter values as reference. They converted the biochemical kinetic equations from  
849 ordinary differential equations into pseudo-chemical kinetic equations for stochastic simulations. They  
850 employed dense sampling of parameter values and repeated stochastic simulations to generate statistical  
851 data for analysis in terms of various fitness correlates. Brajesh et al. (2019) focused on the *lac* operon of  
852 *E. coli* because it is a simple, specific system that has been studied for decades (Muller-Hill, 1996; Ullmann,  
853 2003) and for which there are experimental values for nearly all the key parameters. Starting with this well-  
854 characterized system, they explored its phenotypic repertoire by dense sampling of the parameter space  
855 combined with numerical solution of the ordinary differential equations for the nonlinear mechanistic  
856 model. It will be difficult to replicate these approaches for other systems in which there is a large number  
857 of parameters with unknown value that are difficult or currently impossible to measure or estimate. This is  
858 precisely the bottleneck currently limiting the successful application of the conventional simulation-centric  
859 modeling strategy. This ultimately becomes a scaling issue for large systems because of the density of  
860 sampling required, coupled with the repeated deterministic and stochastic numerical simulations of the  
861 nonlinear differential equations. Moreover, with certain combinations of parameter values these numerical  
862 solutions often fail for technical reasons, which makes automation of the process problematic.

863         The phenotype-centric modeling strategy largely circumvents the bottleneck presented by a  
864 mechanistic model with a large number of unknown parameter values (Valderrama-Gómez & Savageau,  
865 2018). Here we showed that it also can predict phenotype-specific mutation rates and the distribution of  
866 mutant effects under non-selecting and selecting conditions. It must be noted that the phenotype-centric  
867 approach does not escape the issue of scaling to large realistic systems, although it does not involve the  
868 limitations of dense sampling and repeated simulations mentioned above. The issue is the large number of  
869 phenotypes that must be treated analytically for any realistic system. However, each phenotype is a separate  
870 linear algebraic problem, which makes it what computer scientists call ‘embarrassingly parallelizable’, and  
871 therefore amenable to cloud computing.

872         By way of conclusion, we discuss differences between the theoretical framework of System Design  
873 Space and other theoretical frameworks, similarities between them, and potential areas of mutual interest  
874 for further development. We finish with a summary of results, some that are consistent with well-known  
875 results in theoretical population genetics and others that are new.

876

877

## 878 ***Differences and Similarities Between Theoretical Frameworks***

879

880 A broad context of theoretical population genetics is provided by the historical review of Orr (2005). He  
 881 focused on the advances and limitations involving the two main classes of mathematical models: older  
 882 phenotype-based models following in the spirit of Fisher's geometric model and newer DNA sequence-  
 883 based models emphasizing nearly neutral and extreme value theory.

884 The Design Space model has some superficial similarity to the geometric model of Fisher (1930),  
 885 but it is fundamentally different. Although both prominently feature *geometry, quantitative phenotype*  
 886 *traits* and *size of changes* caused by mutations, a brief comparison of Fisher's Geometric model vs. the  
 887 Design Space model shows there is little else in common:

- 888 • Phenotype definition is *generic, ad hoc, and descriptive* (height, weight, etc.) vs. *specific,*  
 889 *mathematical, and rigorous* (genotypically-determined parameters and environmentally determined  
 890 variables).
- 891 • Phenotypic traits are for *unspecified systems in unstructured Cartesian space* vs. *biochemically*  
 892 *specified systems in structured logarithmic space.*
- 893 • Mutation causing *symmetric* changes involving *any combination of the orthogonal traits*  
 894 *(omnidirectional)* vs. *asymmetric* (entropic) changes involving *one mechanistic trait (bidirectional)*.
- 895 • Mutations simultaneously affect *all n traits in general* (highly pleiotropic) vs. *n = 1 specific trait*  
 896 (model-dependent pleiotropic).
- 897 • Organizing principle is *random variation in proximity to an optimum* vs. *deterministic structure of a*  
 898 *Design Space.*
- 899 • Methodology focused on *statistical analysis and computer simulation* vs. *analytic geometry and*  
 900 *computational algebra.*
- 901 • Focus on new mutations vs. standing genetic variation.

902

903 Although these theories are very different, there are a few connections between them that might be  
 904 worth exploring. For example, two strong results from Fisher's model and the extreme value theory are  
 905 that an exponential distribution of positive effects mutations may be universal (Orr, 2005) and that there is  
 906 a progression of size effects from initially large to subsequent smaller (Gillespie, 2004). In Design Space  
 907 theory, the first of these results might have a connection to the assumption of exponential distributions for  
 908 both positive and negative effect mutations. However, these exponential distributions are in logarithmic  
 909 coordinates, which in design space theory means that they could also be considered power law in Cartesian  
 910 coordinates. Regarding the second of the above results, we can speculate that if the initial mutation takes  
 911 the system from an optimal state into a qualitatively different region of Design Space, then the first  
 912 significant mutation taking it back will likely have a large effect on average. Once back near the optimum,  
 913 then smaller quantitative changes will add refinements. However, back mutations with small changes at  
 914 the level of kinetic parameters could lead to large qualitative changes at the phenotype level, but only when  
 915 the phenotype undergoing back mutation is quantitatively near the common boundary with the recipient  
 916 phenotype. This is also related to the long-standing robustness vs. evolvability issue (de Visser et al., 2003;

917 Draghi et al., 2010; Payne & Wagner, 2014; Greenbury et al., 2016; Wei & Zhang, 2017). In our  
918 mechanistic framework phenotypes with large volumes in System Design Space are globally the most  
919 robust to mutation (to changes in the qualitatively distinct phenotype). Mutations with large-size effects  
920 can explore distant phenotypes infrequently. However, if there is a more favorable adjacent phenotype,  
921 then there will always be a minority of cells with parameters that locate them near the boundary with the  
922 more favorable phenotype so that even mutations with small-size effects can result in movement into a  
923 qualitatively different phenotypic region that is favorable. Thus, evolvability coexists with robustness. A  
924 statistical approach within the Design Space framework could be used to test these speculations.

925 The results in **Figure 6**, which represent the most extreme bottleneck with a single founder cell,  
926 suggest that most of the phenotypes are regenerated with sizable cell numbers within the initial growth  
927 phase. A stochastic approach could be used to study the long-term fate of the remaining phenotypes whose  
928 population sizes are  $< \sim 100$  cells, each of which is retained or lost in each generation.

929 In this paper, the phenotype-centric approach provides a novel theoretical framework to pose and  
930 answer questions of phenotype-specific mutation rates and ranking of phenotype frequencies in the  
931 population under non-selecting and selecting conditions. This framework makes a key distinction between  
932 ‘*entropy increasing/entropy decreasing*’ mutations, which cause genetically-determined parameter values  
933 to change in the direction of an increase/decrease in entropy, and ‘*beneficial/detrimental*’ mutations, which  
934 cause the integrated activities of the entire system to change in the direction of an increases/decreases in  
935 phenotype fitness. The two causes are separable. The importance of the distinction can be exemplified by  
936 considering the consequence for a population evolving in a temperature gradient (Zhang et al., 2018;  
937 Wooliver et al., 2020).

938 In an idealized case, if the population finds itself in a new environment with a higher temperature  
939 than the one in which it was previously adapted, the binding of a regulator will now be less effective (higher  
940 temperature implies looser binding). The fitness of the organisms will typically decrease. An *entropy-*  
941 *decreasing* mutation causing tighter binding of the regulator can cause an improvement in fitness.  
942 Conversely, an *entropy-increasing* mutation causing an even looser binding can cause a further reduction  
943 in fitness. The argument is different if the population finds itself in a new environment that has a lower  
944 temperature. The binding of the regulator will now be too tight (lower temperature implies stronger  
945 binding). The fitness of the organisms will typically decrease. Now, an *entropy-increasing* mutation that  
946 causes a looser binding of the regulator can improve fitness. Conversely, an *entropy-decreasing* mutation  
947 that causes an even tighter binding can cause a further reduction in fitness. Thus, depending on the  
948 environmental condition, an entropically probable mutation at the level of the molecular mechanism can  
949 cause either a beneficial or detrimental effect on fitness at the level of an integrated system (**Figures 3 &**

950 7). These same distinctions provide a mechanistic context for interpreting the large differences in frequency  
951 of positive-effect mutations that have been discussed by Bondel, et al. (2019).

952 The theoretical framework based on Design Space analysis can distinguish and quantify various  
953 phenomena. For example, it distinguishes among three contributions to phenotype-specific mutation rates:  
954 phenotype robustness (volume in Design Space), size effect and directional bias, and selection (**Figure 3**);  
955 distinguishes among three contributions to the equilibrium distribution with neutral fitness effects(**Eqn. 9**):  
956 mutation alone and selection alone, which nearly balance, and mutation-x-selection (mutations generated  
957 specifically by the selected phenotype), which is only significant with extremely strong selection (**Figure**  
958 **4**); quantifies the different time scales of evolution between equilibria under selecting and non-selecting  
959 conditions (**Figure 5**).

960

### 961 *Summary of Results Old and New*

962

963 The findings in **RESULTS** agree with many well-known phenomena in theoretical population genetics.  
964 Examples include stronger selection is needed to counteract higher mutation rates, evolution can be faster  
965 with higher mutation rates, positive-effect mutations are rare in well adapted systems and small-effect  
966 mutations are common, and the characteristic distributions observed in *directional* (Darwin, 1859; Mitchell-  
967 Olds et al., 2007) and *stabilizing* (Charlesworth et al., 1982; Campbell & Reece, 2002) selection; *mutation-*  
968 *selection balance* (Barton, 2007; Lynch, 2010), and cryptic variation under non-selecting conditions (Paaby  
969 et al., 2014; Zheng et al., 2019).

970 However, in all these cases the Design Space framework provides a more nuanced understanding  
971 of their underlying molecular mechanisms with phenotype-specific mutation playing a role in each. For  
972 example, the phenotype distribution with no size effect, directional bias or differences in growth rate under  
973 the non-selecting condition, which might be expected to produce a uniform distribution of mutant effects,  
974 is weakly directional even though no selection is involved (**Figure 3A, Blue**); the causal fitness  
975 characteristic is the robustness (polytope volume) of phenotypes with phenotype #6 dominating. The  
976 phenotype distribution with size effect and directional bias but no differences in growth rate under the non-  
977 selecting condition is more strongly directional even though no selection is involved (**Figure 3A, Black**),  
978 with phenotype #6 dominating; the causal fitness characteristics are robustness and entropy. Although the  
979 phenotype distribution with size effect, directional bias and protein burden differences in growth rate under  
980 the non-selecting condition may also appear to be directional (**Figure 3B, Red**), with phenotype #11  
981 dominating, it is actually balancing since the causal fitness characteristics are a balance between protein  
982 burden differences in growth rate in one direction and entropy in the other. Furthermore, the point of  
983 balance is a function of the general mutation rate  $m$ , which is  $10^{-7}$  in this case. With a higher general



984 mutation rate  $m$ , the balance shifts in favor of entropy (**Figure 3B**), and as  $m$  approaches  $10^{-4}$ , entropy  
985 dominates to such an extent that the distribution suggests directional selection. The phenotype distribution  
986 with size effect, directional bias and protein burden differences in growth rate under the selecting condition  
987 is a more complex balancing selection (**Figure 3C**, Black), with phenotype #7 dominating; the causal fitness  
988 characteristics are a balance between protein burden differences in growth rate in one direction and the  
989 selective advantage of oscillation and entropy in the other. The general mutation rate ( $m = 10^{-7}$  in this case)  
990 also plays a causal role in the balance. The distribution of cryptic variation present under non-selecting  
991 conditions differs, depending on whether the fitness effects of mutations are neutral (**Figure 3A**, Black) vs.  
992 near-neutral (**Figure 3B**, Red). Although it is difficult to measure such small differences in fitness  
993 experimentally, the resulting distributions are markedly different, as are the results under selection (**Figure**  
994 **7**). The causal fitness characteristics involved in the balance are entropy, protein burden differences in  
995 growth rate, and genomic mutation rate; the first is dominant in the neutral case, the second is dominant in  
996 the near-neutral case, and the third is capable of eliminating the distinction between neutral and near-neutral  
997 at sufficiently high rates (**Figure 3B**, Blue).

998 Other results are new, e.g., there is an optimal mutation rate for each phenotype (**Figures 3 & S7**);  
999 the percentage of positive effect mutations is smaller when equilibrium is dominated by phenotypes with  
1000 high entropy and larger when dominated by those with low entropy (**Figure 7**); evolution is slower in the  
1001 former and faster in the latter; there are many changes in population rank with weak selection (**Figure 5**),  
1002 and few with strong selection (not shown); a non-selected phenotype can increase (without hitch-hiking) as  
1003 an indirect result of selection for a different phenotype connected by a high phenotype-specific mutation  
1004 rate (**Figure S8**); and back calculation of selection coefficients is possible from well characterized  
1005 distributions (**Figure 7**). We also provide evidence suggesting that experimental evolution in chemostats  
1006 can be used to experimentally test predictions made possible by the phenotype-centric theory (**Figure 6**).

1007 We return to the fundamental question raised at the outset and ask, what is the relevant distribution  
1008 of phenotype frequencies to consider from which there is evolution of new phenotypes? This is still an  
1009 open question. New phenotypes will grow to dominance when the population suddenly finds itself in a  
1010 selecting condition because of a change in genotype or a change in environment. The results for the clock  
1011 model suggest that the equilibrium distribution of the full repertoire in the non-selecting condition with  
1012 neutral fitness effects, might be most relevant to consider (**Figure 7**). However, even small differences  
1013 from neutrality that are experimentally undetectable, such as protein burden effects, can result in a marked  
1014 difference in the distribution (**Figure 3**) that argue against its relevance in the case of the natural *lac* operon.

1015 Finally, it should be noted that although we have emphasized qualitatively-distinct phenotypes,  
1016 *quantitative* variants exist within each phenotypic region in System Design Space. Thus, the phenotype-  
1017 centric approach also provides the opportunity to explore finer changes in quantitative characteristics such

1018 as frequency, phase and amplitude of the oscillations within the region of phenotype #7 (Lomnitz &  
1019 Savageau, 2013). Such results would be relevant to the work of Ouyang et al. (1998) showing that mutants  
1020 with small changes in frequency of the cyanobacteria circadian clock experience negative selection when  
1021 their frequency differs from that of the environmental light-dark cycle.

1022

## 1023 MATERIALS AND METHODS

1024

1025 Methods developed in this work are described in the section DERIVATION OF PHENOTYPE-SPECIFIC  
1026 MUTATION RATE CONSTANTS AND POPULATION DYNAMIC EQUATIONS. Associated  
1027 computational tools with further details can be accessed through the Design Space Toolbox v.3.0, which is  
1028 freely available for all major operating systems via Docker. After Docker has been installed on your system,  
1029 running the following commands on a terminal window will provide access to the software:

1030

- 1031 1. `docker pull savageau/dst3`
- 1032 2. `docker run -d -p 8888:8888 savageau/dst3`
- 1033 3. Access the software by opening the address `http://localhost:8888/` on any internet browser.

1034

1035 Please refer to Valderrama-Gómez et al. (2020) for detailed installation instructions and troubleshooting.  
1036 Several IPython notebooks are provided to reproduce figures in the main text and supplementary  
1037 information. These notebooks can be found within the Docker image (savageau/dst3) under the directory  
1038 **/Supporting\_Notebooks/MBE**.

1039

## 1040 ACKNOWLEDGMENTS

1041

1042 This work was supported in part by a grant from the US National Science Foundation Grant number MCB  
1043 1716833.

1044

## 1045 REFERENCES

1046

- 1047 • Atkinson MR, Savageau MA, Myers JT, Ninfa AJ. 2003. Development of genetic circuitry exhibiting  
1048 toggle switch or oscillatory behavior in *Escherichia coli*. *Cell* 113:597–607.
- 1049 • Avis D. 2000. A revised implementation of the reverse search vertex enumeration algorithm. In: Kalai G,  
1050 Ziegler GM, editors. *Polytopes — Combinatorics and Computation*. DMV Seminar, vol 29. Birkhäuser,  
1051 Basel.
- 1052 • Balsalobre A, Marcacci L, Schibler U. 2000. Multiple signaling pathways elicit circadian gene expression  
1053 in cultured Rat-1 fibroblasts. *Curr Biol*. 10:1291–1294.

- 1054 • Barber CB, Dobkin DP, Huhdanpaa HT. 1996. The Quickhull algorithm for convex hulls. *ACM Trans*  
1055 *Math Softw.* 22:469–483.
- 1056 • Barrick, J.E., Lenski. R.E. 2013. Genome dynamics during experimental evolution. *Nat Rev Genet* 14:  
1057 827–839
- 1058 • Barton NH. 2007. *Evolution*. Cold Spring Harbor, NY: Cold Spring Harbor Laboratory Press.
- 1059 • Bataillon T, Bailey SF. 2014. Effects of new mutations on fitness: insights from models and data. *Ann NY*  
1060 *Acad Sci.* 1320:76–92.
- 1061 • Bell-Pedersen D, Cassone VM, Earnest DJ, Golden SS, Hardin PE, Thomas TL, Zoran MJ. 2005.  
1062 Circadian rhythms from multiple oscillators: lessons from diverse organisms. *Nature Reviews Genetics*  
1063 6:544–556.
- 1064 • Bondel KB, Kraemer SA, Samuels T, McClean D, Lachapelle J, Ness RW, Colegrave N, Keightley PD.  
1065 2019. Inferring the distribution of fitness effects of spontaneous mutations in *Chlamydomonas reinhardtii*.  
1066 *PLoS Biol.* 17(6):e3000192.
- 1067 • Brajesh RG, Dutta D, Saini S. 2019. Distribution of fitness effects of mutations obtained from a simple  
1068 genetic regulatory network model. *Scientific Reports* 9:9842.
- 1069 • Brenner, S. 2000. Genomics: The end of the beginning. *Science* 287:2173–2174.
- 1070 • Bustos SA, Golden SS. 1992. Light-regulated expression of the *psbD* gene family in *Synechococcus* sp.  
1071 strain PCC 7942: evidence for the role of duplicated *psbD* genes in cyanobacteria. *Mol Gen Genet.*  
1072 232:221–230.
- 1073 • Callaway, E. 2020. 'It will change everything': Deep Mind's AI makes gigantic leap in solving protein  
1074 structures. *Nature* 588:203–204.
- 1075 • Campbell NA, Reece JB. 2002. *Biology*. Benjamin Cummings. pp. 450–451
- 1076 • Charlesworth B. 1996. The good fairy godmother of evolutionary genetics. *Current Biology* 6:220.
- 1077 • Charlesworth B, Lande R, Slatkin M. 1982. A neo-Darwinian commentary on macroevolution. *Evolution*  
1078 36:474–478.
- 1079 • Chelliah V, Laibe C, Le Novère N. 2013. BioModels database: a repository of mathematical models of  
1080 biological processes. In: Schneider M, editors. *In Silico Systems Biology. Methods in Molecular Biology*  
1081 (Methods and Protocols), vol 1021. Humana Press, Totowa, NJ.
- 1082 • Cohen, SE, Golden, SS. 2015. Circadian Rhythms in Cyanobacteria. *Microbiology and Molecular Biology*  
1083 *Reviews* 79:373–385
- 1084 • Creux N, Harmer S. 2020. Circadian rhythms in plants. *Cold Spring Harb Perspect Biol.* doi:  
1085 10.1101/cshperspect.a034611
- 1086 • Crow JF. 1988. Eighty years ago: the beginnings of population genetics. *Genetics* 119:473–476.
- 1087 • Darwin CR. 1859. *On the origin of species by means of natural selection, or the preservation of favoured*  
1088 *racés in the struggle for life*. London: John Murray.
- 1089 • de Visser JAGM, Hermisson J, Wagner GP, Meyers LA, Bagheri-Chaichian H, Blanchard JL, Chao L,  
1090 Cheverud JM, Elena SF, Fontana W, Gibson G, Hansen TF, Krakauer D, Lewontin RC, Ofria C, Rice SH,  
1091 von Dassow G, Wagner A, Whitlock MC. 2003. Perspective: Evolution and detection of genetic  
1092 robustness. *Evolution* 57: 1959–1972.
- 1093 • Draghi JA, Parsons TL, Wagner GP, Plotkin JB. 2010. Mutational robustness can facilitate adaptation.  
1094 *Nature* 463:353–355.
- 1095 • Fan YJ, Wu YC, Chen Y, Kung YC, Wu TH, Huang KW, Sheen HJ, Chiou PY. 2013. Three dimensional  
1096 microfluidics with embedded microball lenses for parallel and high throughput multicolor fluorescence  
1097 detection. *Biomicrofluidics* 7:044121.
- 1098 • Fisher RA. 1930. *Genetical Theory of Natural Selection*. Clarendon Press, Oxford
- 1099 • Foster PL, Lee H, Popodi E, Townes JP, Tang H. 2015. Determinants of spontaneous mutation in  
1100 *Escherichia coli* as revealed by whole-genome sequencing. *Proc Natl Acad Sci USA.* 112: E5990–E5999.
- 1101 • Gallet R, Cooper TF, Elena SF, Lenormand T. 2012. Measuring selection coefficients below  $10^{-3}$ : method,  
1102 questions, and prospects. *Genetics* 190:175–168.

- 1103 • Gillespie JH. 2004. Population genetics: a concise guide (2nd ed.). Baltimore, Md.: Johns Hopkins  
1104 University Press.
- 1105 • Greenbury SF, Schaper S, Ahnert SE, Louis AA. 2016. Genetic correlations greatly increase mutational  
1106 robustness and can both reduce and enhance evolvability. *PLoS Comput Biol* 12: e1004773.
- 1107 • Gresham D, Jong J. 2015. The functional basis of adaptive evolution in chemostats. *FEMS Microbiology*  
1108 *Reviews* 39:2–16.
- 1109 • Haldane JBS, Jayakar SD. 1963. Polymorphism due to selection of varying direction. *J. Genetics* 58:237-  
1110 242.
- 1111 • Hardin PE. 2011. Analysis of circadian timekeeping in *Drosophila*. *Advances in Genetics* 74:141–173.
- 1112 • Hawking, S. 2002. On the Shoulders of Giants: The Great Works of Physics and Astronomy. Running  
1113 Press, US, 534-535.
- 1114 • Holtzendorff J, Partensky F, Mella D, Lennon JF, Hess WR, Garczarek L. 2008. Genome streamlining  
1115 results in loss of robustness of the circadian clock in the marine cyanobacterium *Prochlorococcus marinus*  
1116 PCC 9511. *J Biol Rhythms*. 23:187–199.
- 1117 • Kawamoto N, Ito H, Tokuda IT, Iwasaki H. 2020. Damped circadian oscillation in the absence of KaiA in  
1118 *Synechococcus*. *Nature Communications* 11:2242 doi.org/10.1038/s41467-020-16087-x
- 1119 • Khersonsky O, Tawfik DS. 2010. Enzyme promiscuity – evolutionary and mechanistic aspects. In: Hung-  
1120 Wen L, Tadhg PB, editors. Comprehensive natural products III. Elsevier, p. 705-734.
- 1121 • Kimura M. 1983. The Neutral Theory of Molecular Evolution. Cambridge University Press, Cambridge.
- 1122 • Koch AL. 1983. The protein burden of *lac* operon products. *J Mol Evol*. 190:455–462.
- 1123 • Lebeuf-Taylor E, McCloskey N, Bailey SF, Hinz A, Kassen R. 2019. The distribution of fitness effects  
1124 among synonymous mutations in a gene under directional selection. *eLife* 8:e45952.
- 1125 • Leloup JC, Gonze D, Goldbeter A. 1999. Limit cycle models for circadian rhythms based on transcriptional  
1126 regulation in *Drosophila* and *Neurospora*. *J Biol Rhythms*. 14:433–448.
- 1127 • Levin BR, Perrot V, Walker N. 2000. Compensatory mutations, antibiotic resistance and the population  
1128 genetics of adaptive evolution in bacteria. *Genetics* 154:985-997.
- 1129 • Lewin, B. 2008. Genes IX. Jones and Barlett Publishers. p. 318.
- 1130 • Loewe L, Hillston J. 2008. The distribution of mutational effects on fitness in a simple circadian clock.  
1131 *Lecture Notes in Bioinformatics* 5307:156–175.
- 1132 • Lomnitz JG, Savageau MA. 2013. Phenotypic deconstruction of gene circuitry. *Chaos* 23:025108.
- 1133 • Lomnitz, J.G., Savageau, M.A. 2014. Strategy revealing phenotypic differences among oscillator designs.  
1134 *ACS Synthetic Biology* 3, 686-701.
- 1135 • Lomnitz JG, Savageau MA. 2016a. Rapid discrimination among putative mechanistic models of  
1136 biochemical systems. *Sci Rep*. 6:32375.
- 1137 • Lomnitz JG, Savageau MA. 2016b. Design space toolbox v2: automated software enabling a novel  
1138 phenotype-centric modeling strategy for natural and synthetic biological systems. *Front Genet*. 7:118.
- 1139 • Lynch M. 2010. Evolution of the mutation rate. *Trends Genet*. 26:345-352.
- 1140 • Maaløe O, Kjeldgaard NO. 1966. Control of Macromolecular Synthesis. Benjamin, N.Y.
- 1141 • Markiewicz P, Kleina LG, Cruz C, Ehret S, Miller JH. 1994. Genetic Studies of the *lac* repressor XIV:  
1142 Analysis of 4000 altered *Escherichia coli lac* repressors reveals essential and non-essential residues, as  
1143 well as "spacers" which do not require a specific sequence. *J Mol Biol*. 240:421–433.
- 1144 • Matic I, Radman M, Taddei F, Picard B, Doit C, Bingen E, Denamur E, Elion J. 1997. Highly variable  
1145 mutation rates in commensal and pathogenic *Escherichia coli*. *Science* 277:1833-1834.
- 1146 • Matuszewski S, Hermisson J, Kopp M. 2014. Fisher's geometric model with a moving optimum. *Evolution*  
1147 68: 2571-2588.
- 1148 • Maughan H, Masel J, Birky CW Jr, Nicholson WL. 2007. The roles of mutation accumulation and  
1149 selection in loss of sporulation in experimental populations of *Bacillus subtilis*. *Genetics* 177: 937–948.

- 1150 • McCarthy MI, Abecasis GR, Cardon LR, Goldstein DB, Little J, Ioannidis JPA, Hirschhorn JN. 2008.  
1151 Genome-wide association studies for complex traits: consensus, uncertainty and challenges. *Nat Rev*  
1152 *Genet.* 9:356–369.
- 1153 • Metzker, M.L. 2010. Sequencing technologies — the next generation. *Nat Rev Genet.* 11:31–46.
- 1154 • Muller-Hill, B. 1996. The lac Operon, a Short History of a Genetic Paradigm. Berlin: Walter de Gruyter
- 1155 • Mitchell-Olds T, Willis JH, Goldstein DB. 2007. Which evolutionary processes influence natural genetic  
1156 variation for phenotypic traits? *Nat Rev Genet.* 8:845–856.
- 1157 • Nachman MW, Crowell SL. 2000. Estimate of the mutation rate per nucleotide in humans. *Genetics*  
1158 156:297–304.
- 1159 • Nohales MA, Kay SA. 2016. Molecular mechanisms at the core of the plant circadian oscillator. *Nat Struct*  
1160 *Mol Biol.* 23:1061-1069.
- 1161 • Ohta T. 1992. The nearly neutral theory of molecular evolution. *Annu Rev Ecol Syst.* 23:263–286.
- 1162 • O’Neill JS, Reddy AB. 2012. The essential role of cAMP/Ca<sup>2+</sup> signalling in mammalian circadian  
1163 timekeeping. *Biochem Soc Trans.* 40:44–50
- 1164 • Orlenko A, Teufel AL, Chi PB, Liberles DA. 2016. Selection on metabolic pathway function in the  
1165 presence of mutation-selection-drift balance leads to rate-limiting steps that are not evolutionarily stable.  
1166 *Biology Direct* 11:31.
- 1167 • Orlenko A, Chi PB, Liberles DA. 2017. Characterizing the roles of changing population size and selection  
1168 on the evolution of flux control in metabolic pathways. *BMC Evolutionary Biology* 17:117.
- 1169 • Orr, H. 2005. The genetic theory of adaptation: a brief history. *Nat Rev Genet.* 6: 119–127.
- 1170 • Ouyang Y, Andersson CR, Kondo T, Golden SS, Johnson CH. 1998. Resonating circadian clocks enhance  
1171 fitness in cyanobacteria. *Proc Natl Acad Sci USA.* 95:8660-8664.
- 1172 • Paaby AB, Rockman MV. 2014. Cryptic genetic variation: evolution’s hidden substrate. *Nat. Rev. Genet.*  
1173 15:247–258.
- 1174 • Papazyan, R., Zhang, Y., Lazar, M.A. 2016. Genetic and epigenomic mechanisms of mammalian  
1175 circadian transcription. *Nat Struct Mol Biol.* 23:1045-1052.
- 1176 • Payne JL, Wagner A. 2014. The robustness and evolvability of transcription factor binding sites. *Science*  
1177 343:875-877.
- 1178 • Preitner N, Damiola F, Lopez-Molina L, Zakany J, Duboule D, Albrecht U, Schibler U. 2002. The orphan  
1179 nuclear receptor REV-ERB $\alpha$  controls circadian transcription within the positive limb of the mammalian  
1180 circadian oscillator. *Cell* 110:251–260.
- 1181 • Raynes Y, Wylie CS, Sniegowski PD, Weinreich DM. 2018. Sign of selection on mutation rate modifiers  
1182 depends on population size. *Proc Natl Acad Sci USA.* 115:3422–3427.
- 1183 • Reams AB, Kofoid E, Savageau MA, Roth JR. 2010. Duplication frequency in a population of *Salmonella*  
1184 *enterica* rapidly approaches steady state with or without recombination. *Genetics* 184:1077–1094.
- 1185 • Robert L, Olion J, Robert J, Song X, Matic I, Elez M. 2018. Mutation dynamics and fitness effects followed  
1186 in single cells. *Science* 359:1283–1296.
- 1187 • Roenneberg T, Merrow M. 2002. Life before the clock: Modeling circadian evolution. *J Biol Rhythms*  
1188 17:495-505.
- 1189 • Rueda AJV, Palopoli N, Zacarias M, Sommese LM, Parisi G. 2019. ProtMiscuity: a database of  
1190 promiscuous proteins. *Database* Volume 2019, baz103.
- 1191 • Savageau MA. 1971. Concepts relating the behavior of biochemical systems to their underlying molecular  
1192 properties. *Arch Biochem Biophys.* 145:612–621.
- 1193 • Savageau MA. 1975. Optimal design of feedback control by inhibition: dynamic considerations. *J Mol*  
1194 *Evol.* 5:199–222.
- 1195 • Savageau, M.A. 2009. Biochemical Systems Analysis: A Study of Function and Design in Molecular  
1196 Biology, 40th Anniversary Edition [A reprinting of the original edition by Addison-Wesley, Reading,  
1197 Mass (1976)].

- 1198 • Savageau, M.A. 2013. Phenotypes and Design Principles in System Design Space. In: Walhout AJM,  
1199 Vidal M, Dekker J, editors. Handbook of Systems Biology. Elsevier, San Diego, CA, p. 287-310.
- 1200 • Savageau MA, Fasani RA. 2009. Qualitatively distinct phenotypes in the design space of biochemical  
1201 systems. *FEBS Lett.* 583:3914-22.
- 1202 • Savageau MA, Coelho PM, Fasani RA, Tolla DA, Salvador A. 2009. Phenotypes and tolerances in the  
1203 design space of biochemical systems. *Proc Natl Acad Sci U S A.* 106:6435–40.
- 1204 • Sniegowski PD, Gerrish PJ, Johnson T, Shaver A. 2000. The evolution of mutation rates: separating causes  
1205 from consequences. *BioEssays* 22:1057-1066.
- 1206 • Stricker J, Cookson S, Bennett MR, Mather WH, Tsimring LS, Hasty J. 2008. A fast, robust and tunable  
1207 synthetic gene oscillator. *Nature* 456:516–519.
- 1208 • Tataru P, Mollion M, Glémin S, Bataillon T. 2017. Inference of distribution of fitness effects and  
1209 proportion of adaptive substitutions from polymorphism data. *Genetics* 207:1103-1119.
- 1210 • Templeton AR. 2021. Population genetics and microevolutionary theory. 2<sup>nd</sup> edition, John Wiley & Sons,  
1211 N.J.
- 1212 • Tigges M, Marquez-Lago TT, Stelling J, Fussenegger M. 2009. A tunable synthetic mammalian oscillator.  
1213 *Nature* 457:309–312.
- 1214 • Thron CD. 1991. The secant condition for instability in biochemical feedback control. I. The role of  
1215 cooperativity and saturability. *Bull Math Biol.* 53:383–401.
- 1216 • Ullmann, A. (ed.) 2003. Origins of Molecular Biology: A Tribute to Jacques Monod. ASM Press,  
1217 Washington, DC.
- 1218 • Valderrama-Gómez MA, Parales RE, Savageau MA. 2018. Phenotype-centric modeling for elucidation of  
1219 biological design principles. *J Theoret Biol.* 455:281-292.
- 1220 • Valderrama-Gómez MA, Lomnitz JG, Fasani RA, Savageau MA. 2020. Mechanistic modeling of  
1221 biochemical systems without a priori parameter values using the Design Space Toolbox v.3.0. *iScience*  
1222 23:1-19.
- 1223 • Voit EO. 2000. Computational Analysis of Biochemical Systems: A Practical Guide for Biochemists and  
1224 Molecular Biologists. Cambridge University Press, Cambridge, U.K.
- 1225 • Voit EO. 2013. Biochemical systems theory: a review. Int Scholarly Res Network (ISRN  
1226 Biomathematics). Article 897658, pp. 1-53.
- 1227 • Wakeley J. 2005. The limits of theoretical population genetics. *Genetics* 169: 1-7.
- 1228 • Wei X, Zhang J. 2017. Why phenotype robustness promotes phenotype evolvability. *Genome Biology and*  
1229 *Evolution* 9:3509-3515.
- 1230 • Westra ER, Sünderhauf D, Landsberger M, Buckling A. 2017. Mechanisms and consequences of diversity-  
1231 generating immune strategies. *Nat Rev Immunol.* 17:719-728.
- 1232 • Wilke CO. 2005. Quasispecies theory in the context of population genetics. *BMC Evolutionary Biology*  
1233 5:44 doi:10.1186/1471-2148-5-44.
- 1234 • Wooliver R, Tittes SB, Sheth SN. 2020. A resurrection study reveals limited evolution of thermal  
1235 performance in response to recent climate change across the geographic range of the scarlet monkeyflower.  
1236 *Evolution* 74:1699-1710.
- 1237 • Zhang QG, Lu HS, Buckling A. 2018. Temperature drives diversification in a model adaptive radiation.  
1238 *Proc R Soc B.* 285:20181515.
- 1239 • Zheng J, Payne JL, Wagner A. 2019. Cryptic genetic variation accelerates evolution by opening access to  
1240 diverse adaptive peaks. *Science* 365:347-353.
- 1241 • Zhukov AA, Pritchard RH, Withers MJ, Hailes T, Gold RD, Hayes C, la Cour MF, Hussein F, Rogers SS.  
1242 2021. Extremely high-throughput parallel microfluidic vortex-actuated cell sorting. *Micromachines*  
1243 12:389.
